# Supplementary material for: New Cyclic Cystine Bridged Peptides from the Sponge Suberites waedoensis
Source: Mar Drugs. 2014 May 12;12(5):2760–70. doi: 10.3390/md12052760 (PMC4052314; doi:10.3390/md12052760)

# Supplementary Information

## Table of Content

### I. Compound 1

- Figure S1.** The  $^1\text{H}$  NMR (600 MHz, MeOH- $d_4$ ) spectrum of compound 1  
**Figure S2.** The  $^{13}\text{C}$  NMR (150 MHz, MeOH- $d_4$ ) spectrum of compound 1  
**Figure S3.** The  $g\text{HSQC}$  (600 MHz, MeOH- $d_4$ ) spectrum of compound 1  
**Figure S4.** The  $g\text{HMBC}$  (600 MHz, MeOH- $d_4$ ) spectrum of compound 1  
**Figure S5.** The TOCSY (600 MHz, MeOH- $d_4$ ) spectrum of compound 1  
**Figure S6.** The COSY (600 MHz, MeOH- $d_4$ ) spectrum of compound 1  
**Figure S7.** The ROESY (600 MHz, MeOH- $d_4$ ) spectrum of compound 1  
**Figure S8.** The  $^1\text{H}$  NMR (600 MHz, MeOH- $d_3$ ) spectrum of compound 1  
**Figure S9.** The  $g\text{HMBC}$  (600 MHz, MeOH- $d_3$ ) spectrum of compound 1  
**Figure S10.** The TOCSY (600 MHz, MeOH- $d_3$ ) spectrum of compound 1  
**Figure S11.** The COSY (600 MHz, MeOH- $d_3$ ) spectrum of compound 1  
**Figure S12.** The ROESY (600 MHz, MeOH- $d_3$ ) spectrum of compound 1

### II. Compound 2

- Figure S13.** The  $^1\text{H}$  NMR (600 MHz, MeOH- $d_4$ ) spectrum of compound 2  
**Figure S14.** The  $^{13}\text{C}$  NMR (150 MHz, MeOH- $d_4$ ) spectrum of compound 2  
**Figure S15.** The  $g\text{HSQC}$  (600 MHz, MeOH- $d_4$ ) spectrum of compound 2  
**Figure S16.** The  $g\text{HMBC}$  (600 MHz, MeOH- $d_4$ ) spectrum of compound 2  
**Figure S17.** The TOCSY (600 MHz, MeOH- $d_4$ ) spectrum of compound 2  
**Figure S18.** The COSY (600 MHz, MeOH- $d_4$ ) spectrum of compound 2  
**Figure S19.** The ROESY (600 MHz, MeOH- $d_4$ ) spectrum of compound 2  
**Figure S20.** The  $^1\text{H}$  NMR (600 MHz, MeOH- $d_3$ ) spectrum of compound 2  
**Figure S21.** The  $g\text{HMBC}$  (600 MHz, MeOH- $d_3$ ) spectrum of compound 2  
**Figure S22.** The TOCSY (600 MHz, MeOH- $d_3$ ) spectrum of compound 2  
**Figure S23.** The COSY (600 MHz, MeOH- $d_3$ ) spectrum of compound 2  
**Figure S24.** The ROESY (600 MHz, MeOH- $d_3$ ) spectrum of compound 2

**Figure S1.** The  $^1\text{H}$  NMR (600 MHz,  $\text{MeOH-}d_4$ ) spectrum of compound **1**.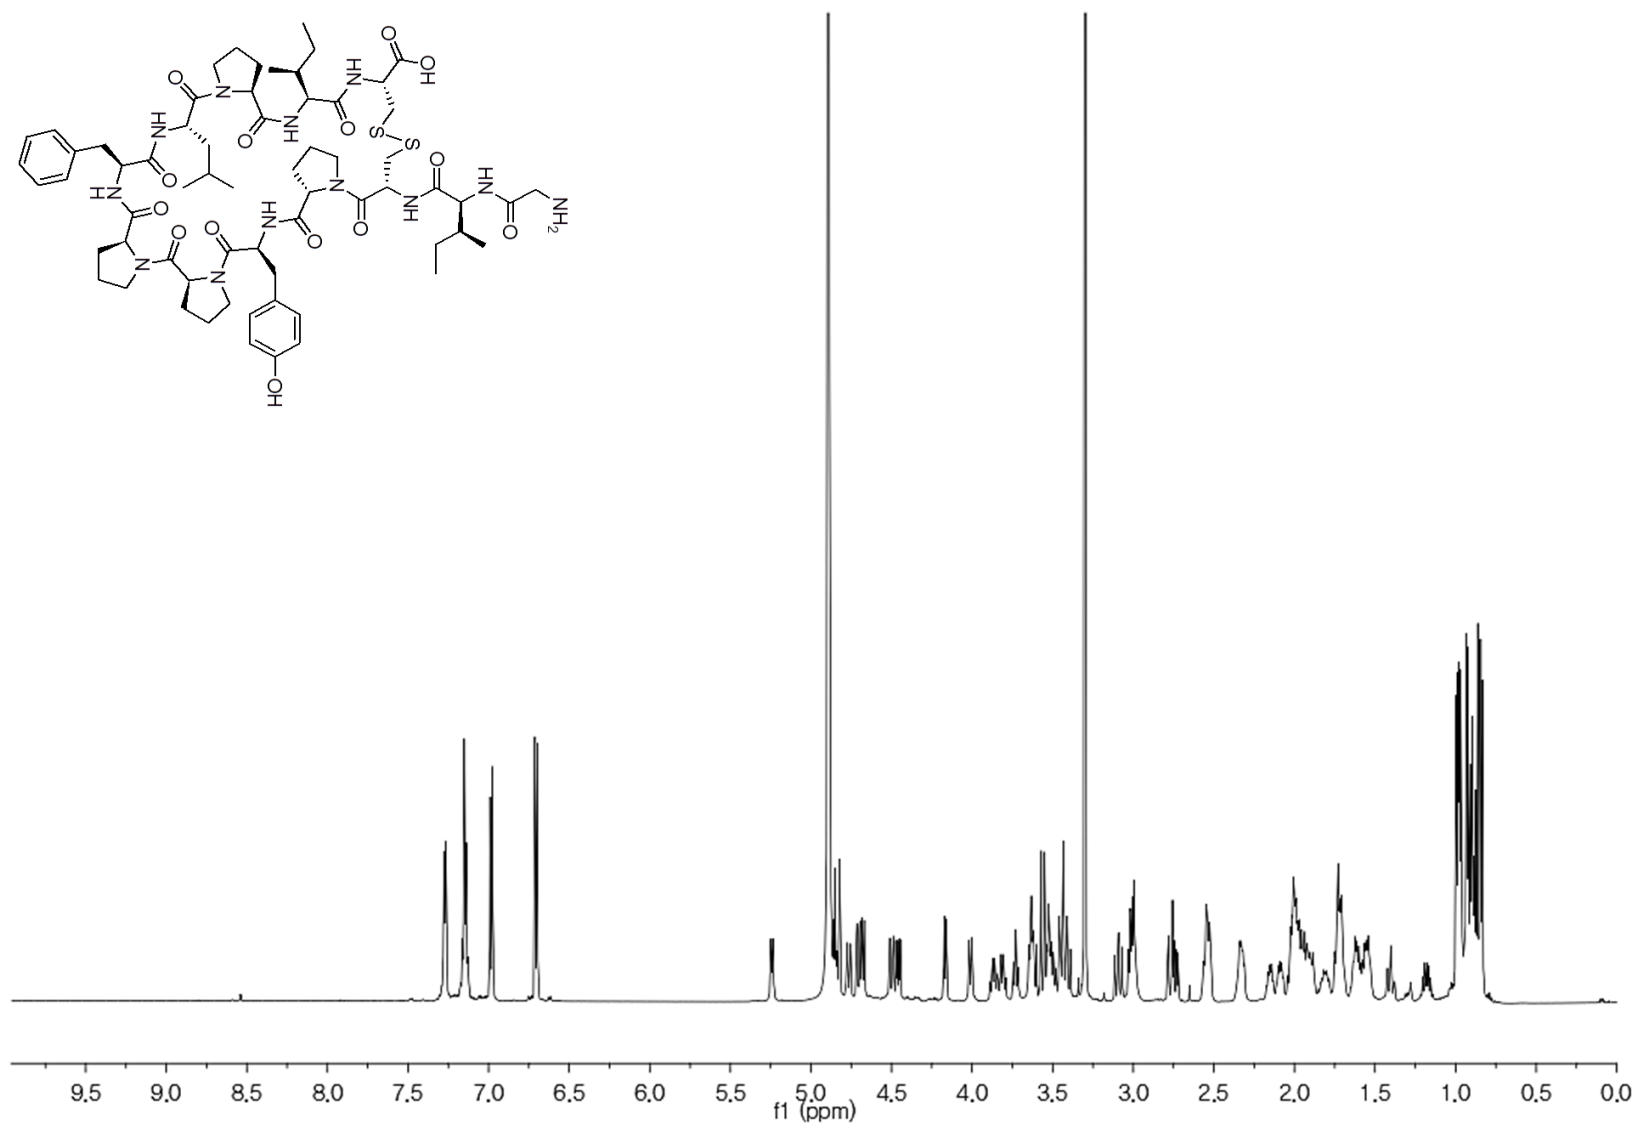

**Figure S2.** The  $^{13}\text{C}$  NMR (150 MHz,  $\text{MeOH-}d_4$ ) spectrum of compound 1.

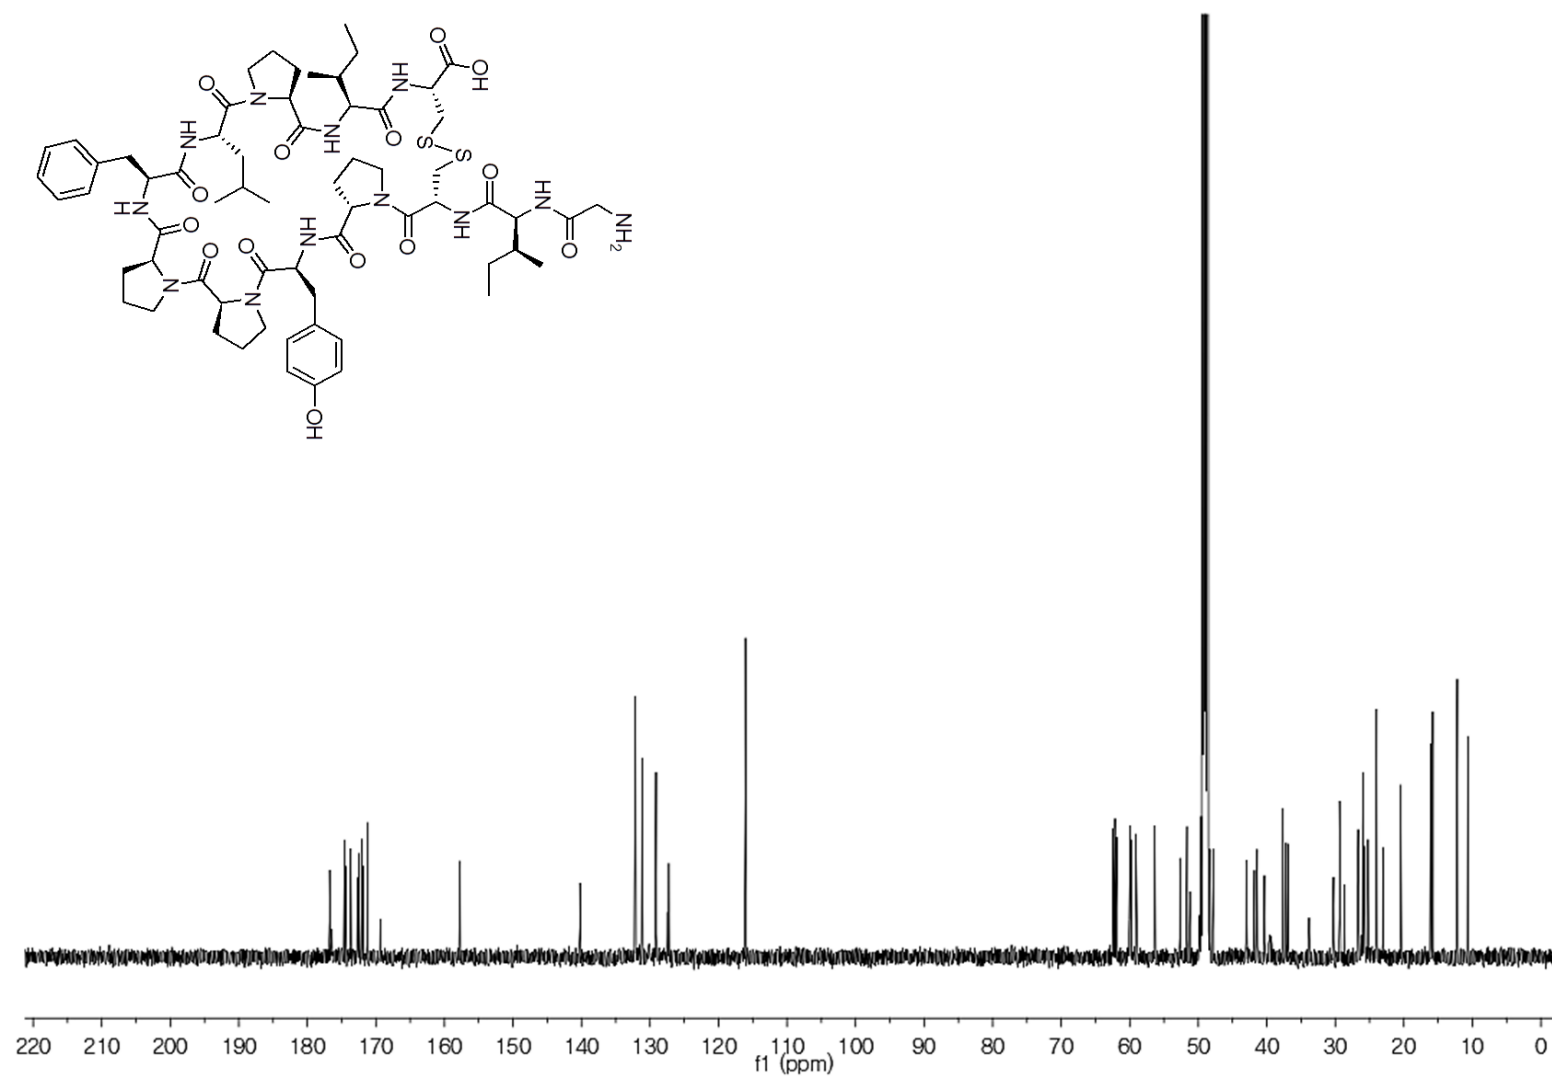

**Figure S3.** The gHSQC (600 MHz, MeOH- $d_4$ ) spectrum of compound **1**.

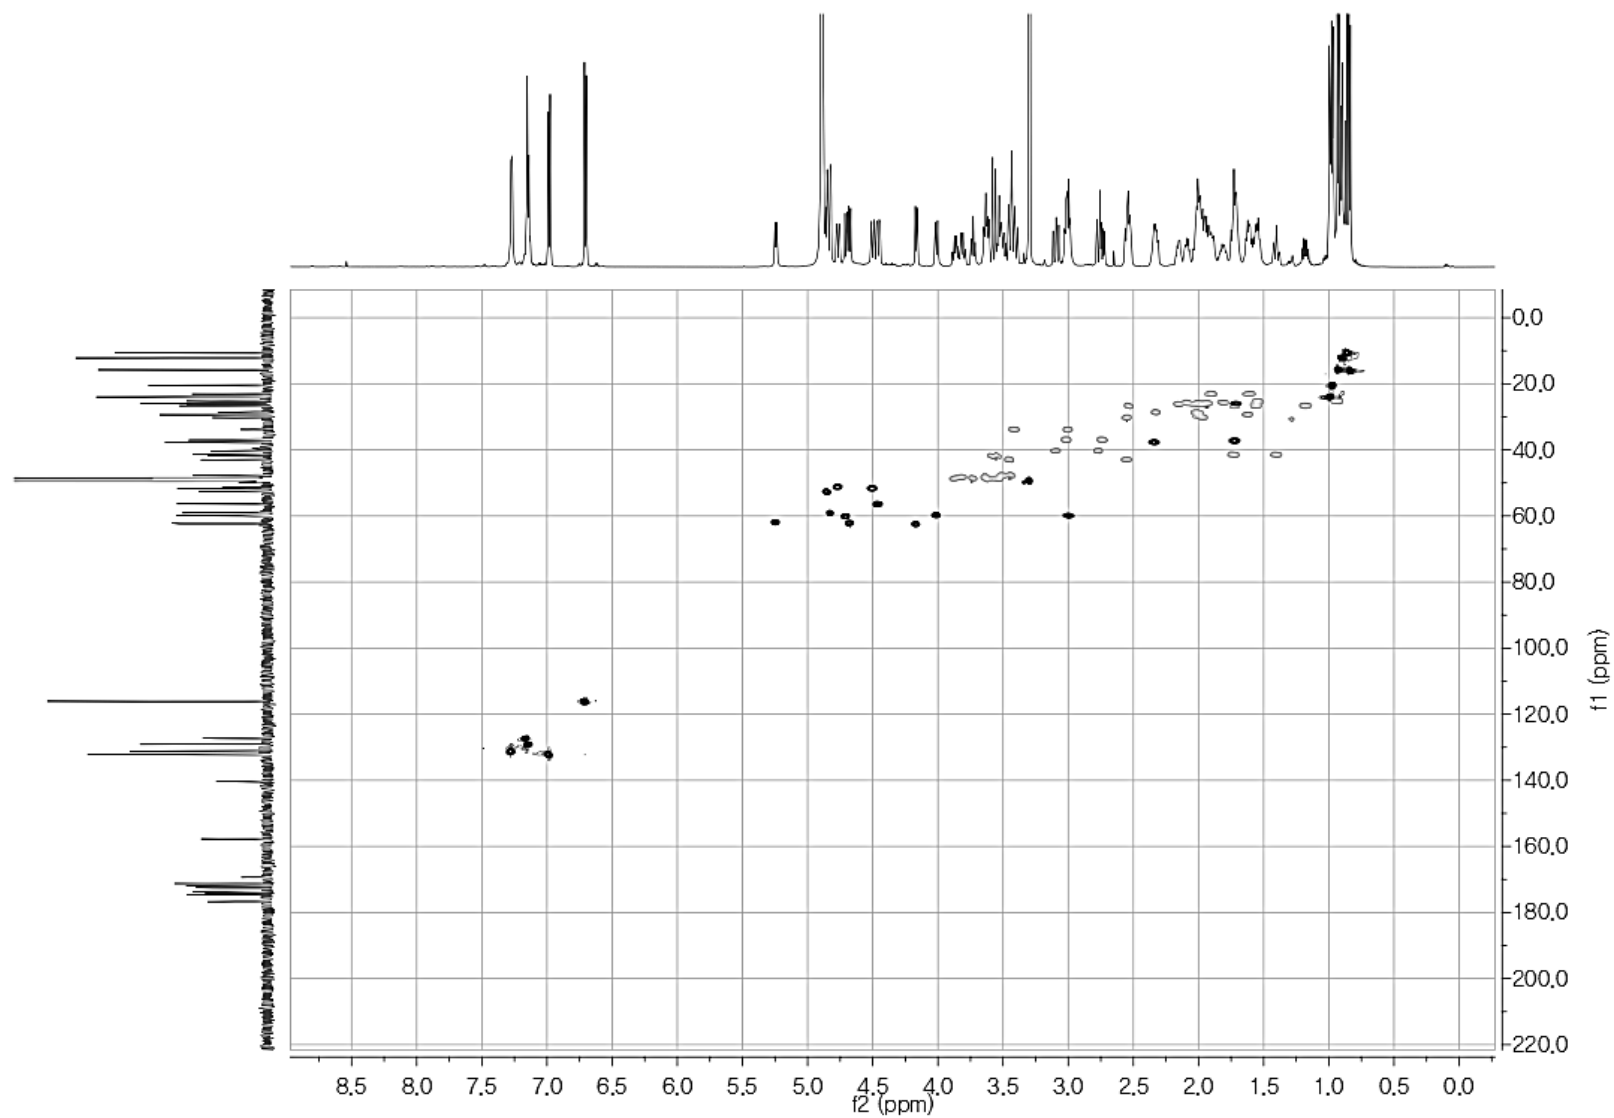

**Figure S4.** The gHMBC (600 MHz, MeOH- $d_4$ ) spectrum of compound **1**.

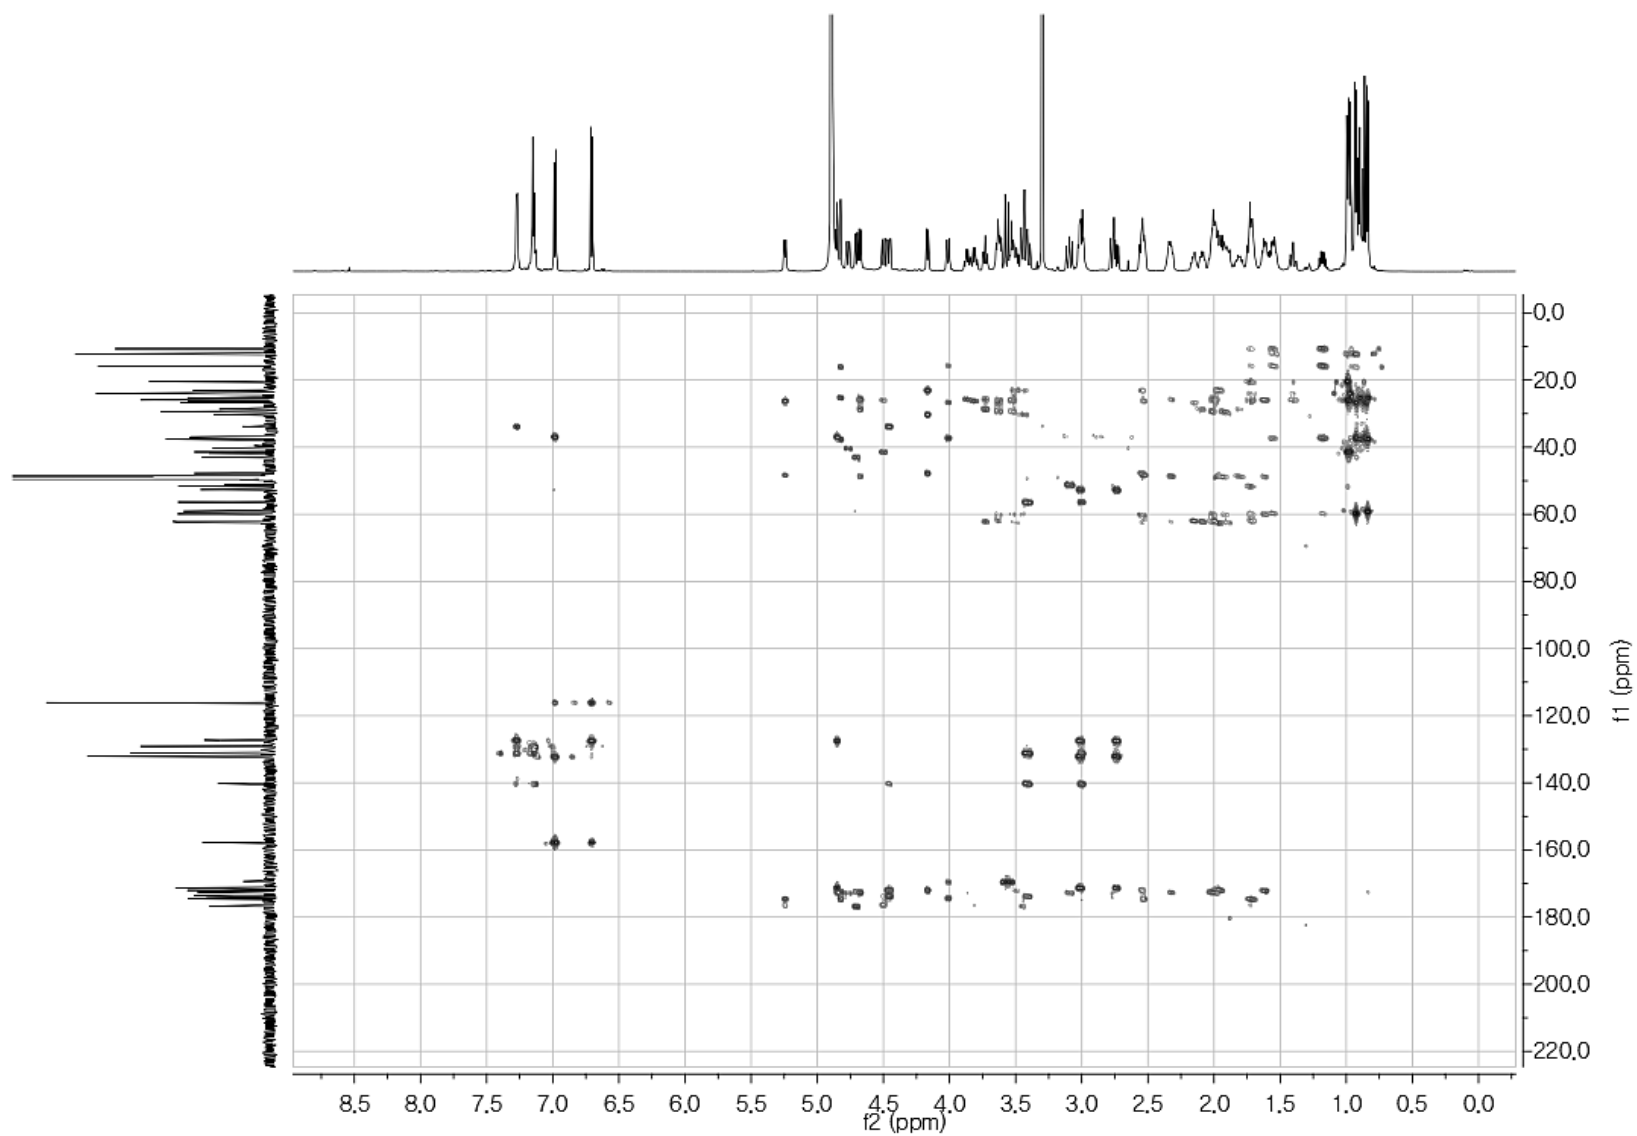

**Figure S5.** The TOCSY (600 MHz, MeOH- $d_4$ ) spectrum of compound **1**.

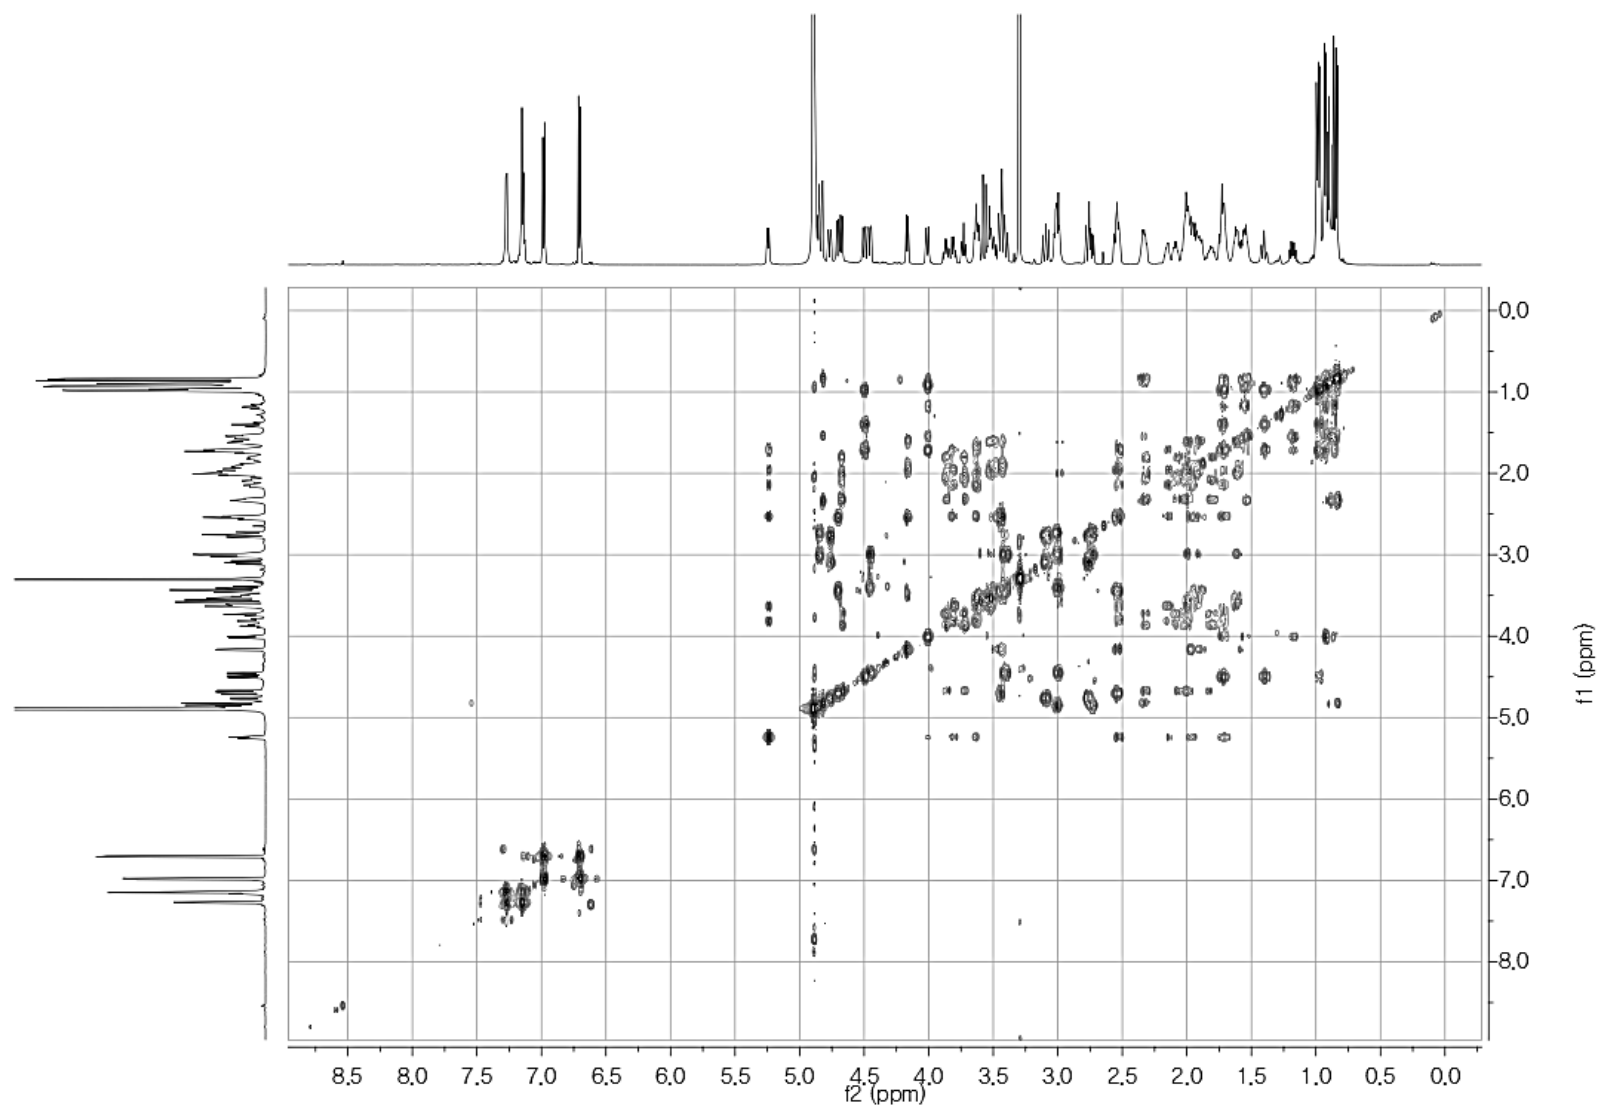

**Figure S6.** The COSY (600 MHz, MeOH- $d_4$ ) spectrum of compound 1.

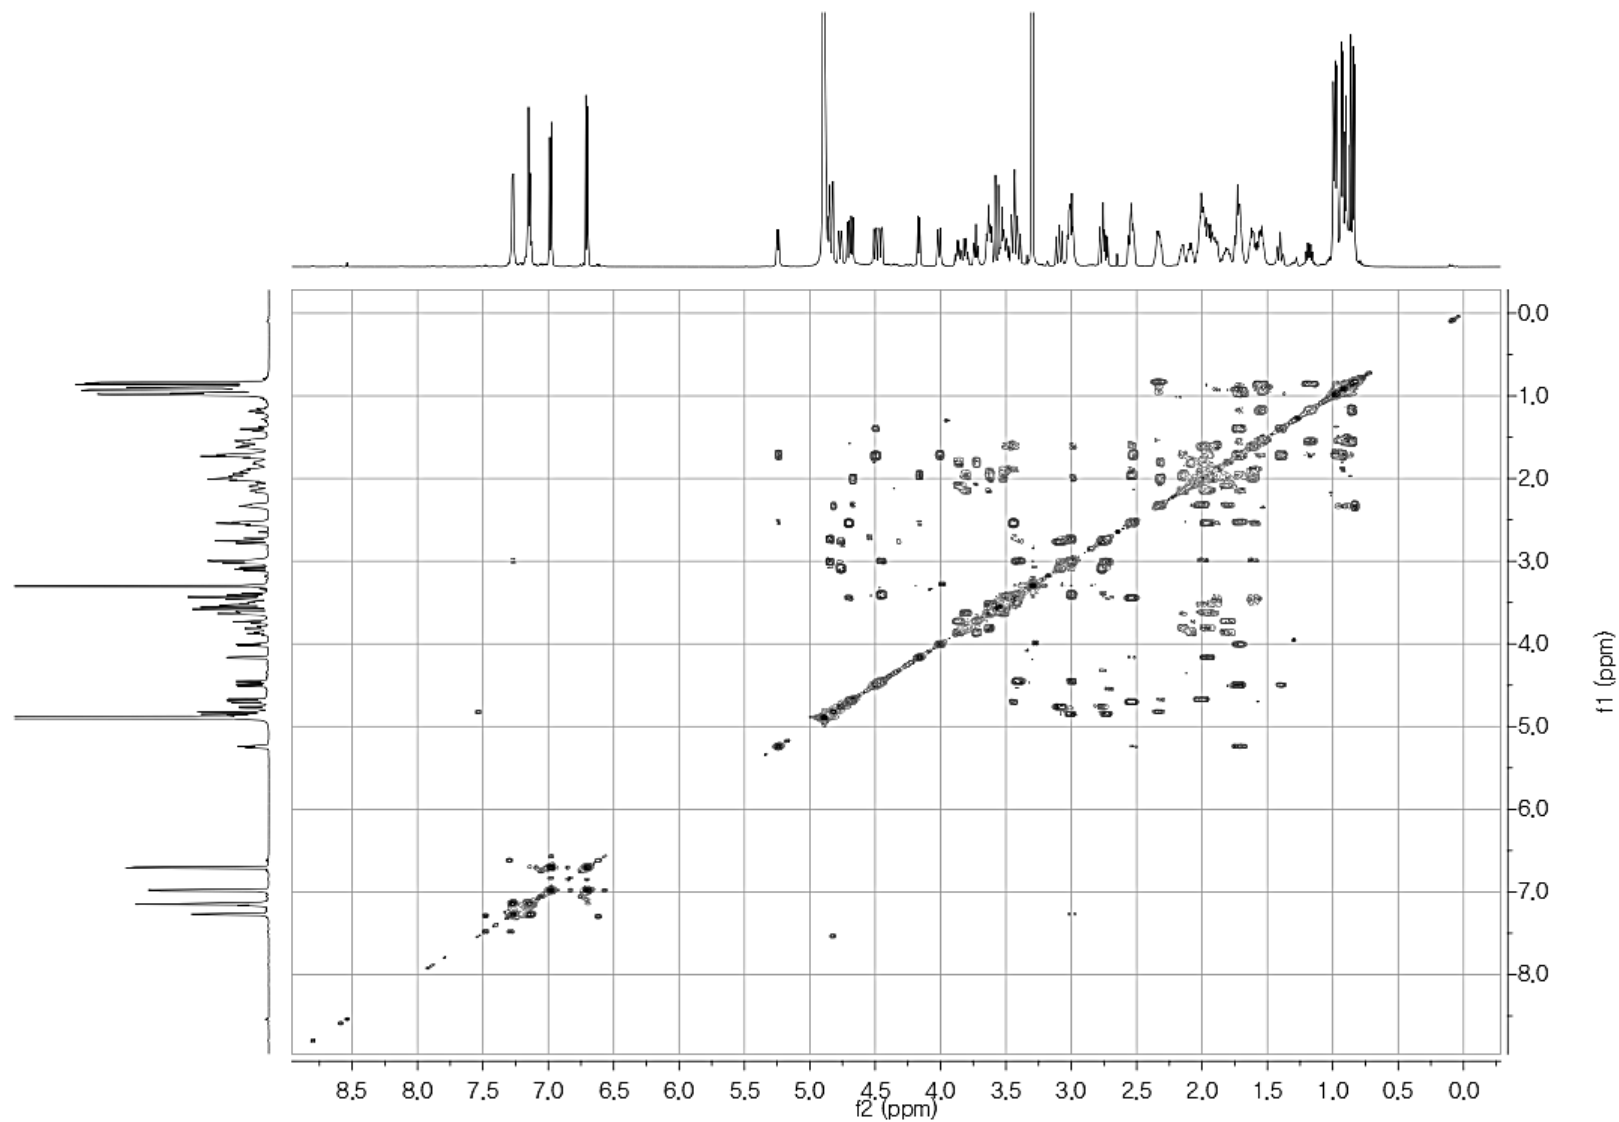

**Figure S7.** The ROESY (600 MHz, MeOH- $d_4$ ) spectrum of compound **1**.

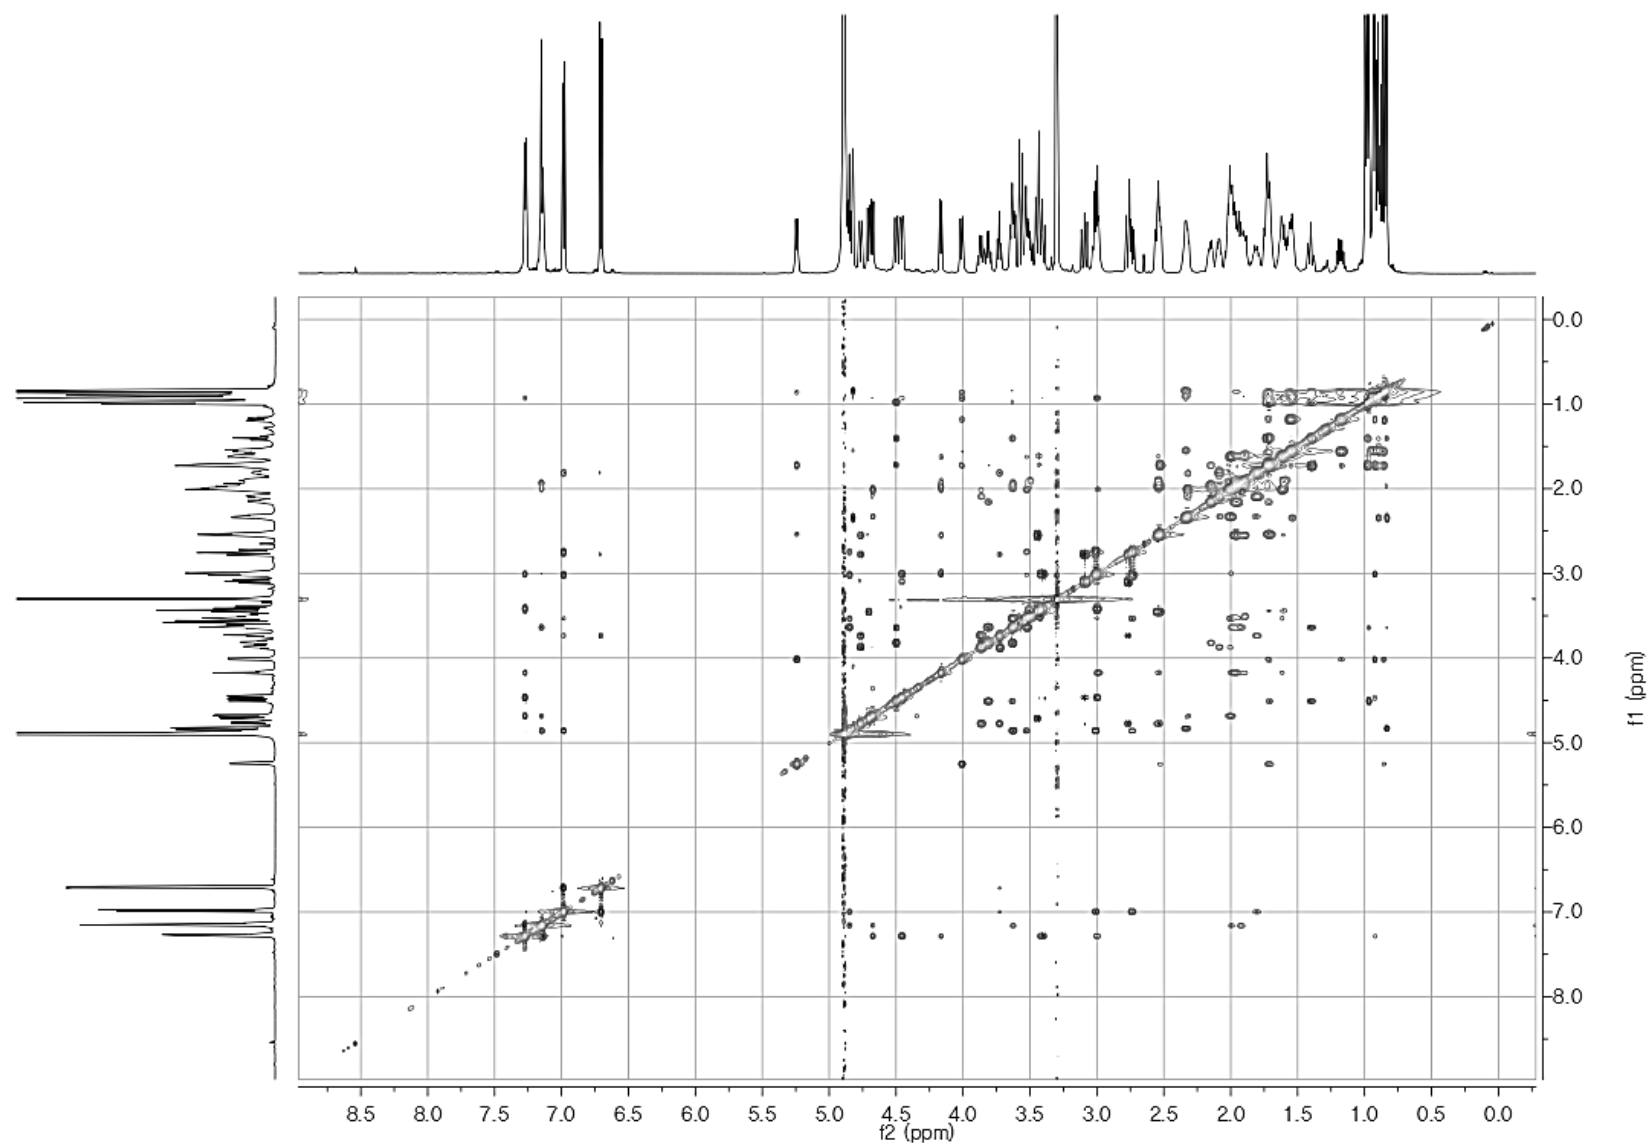

**Figure S8.** The  $^1\text{H}$  NMR (600 MHz,  $\text{MeOH-}d_3$ ) spectrum of compound **1**.

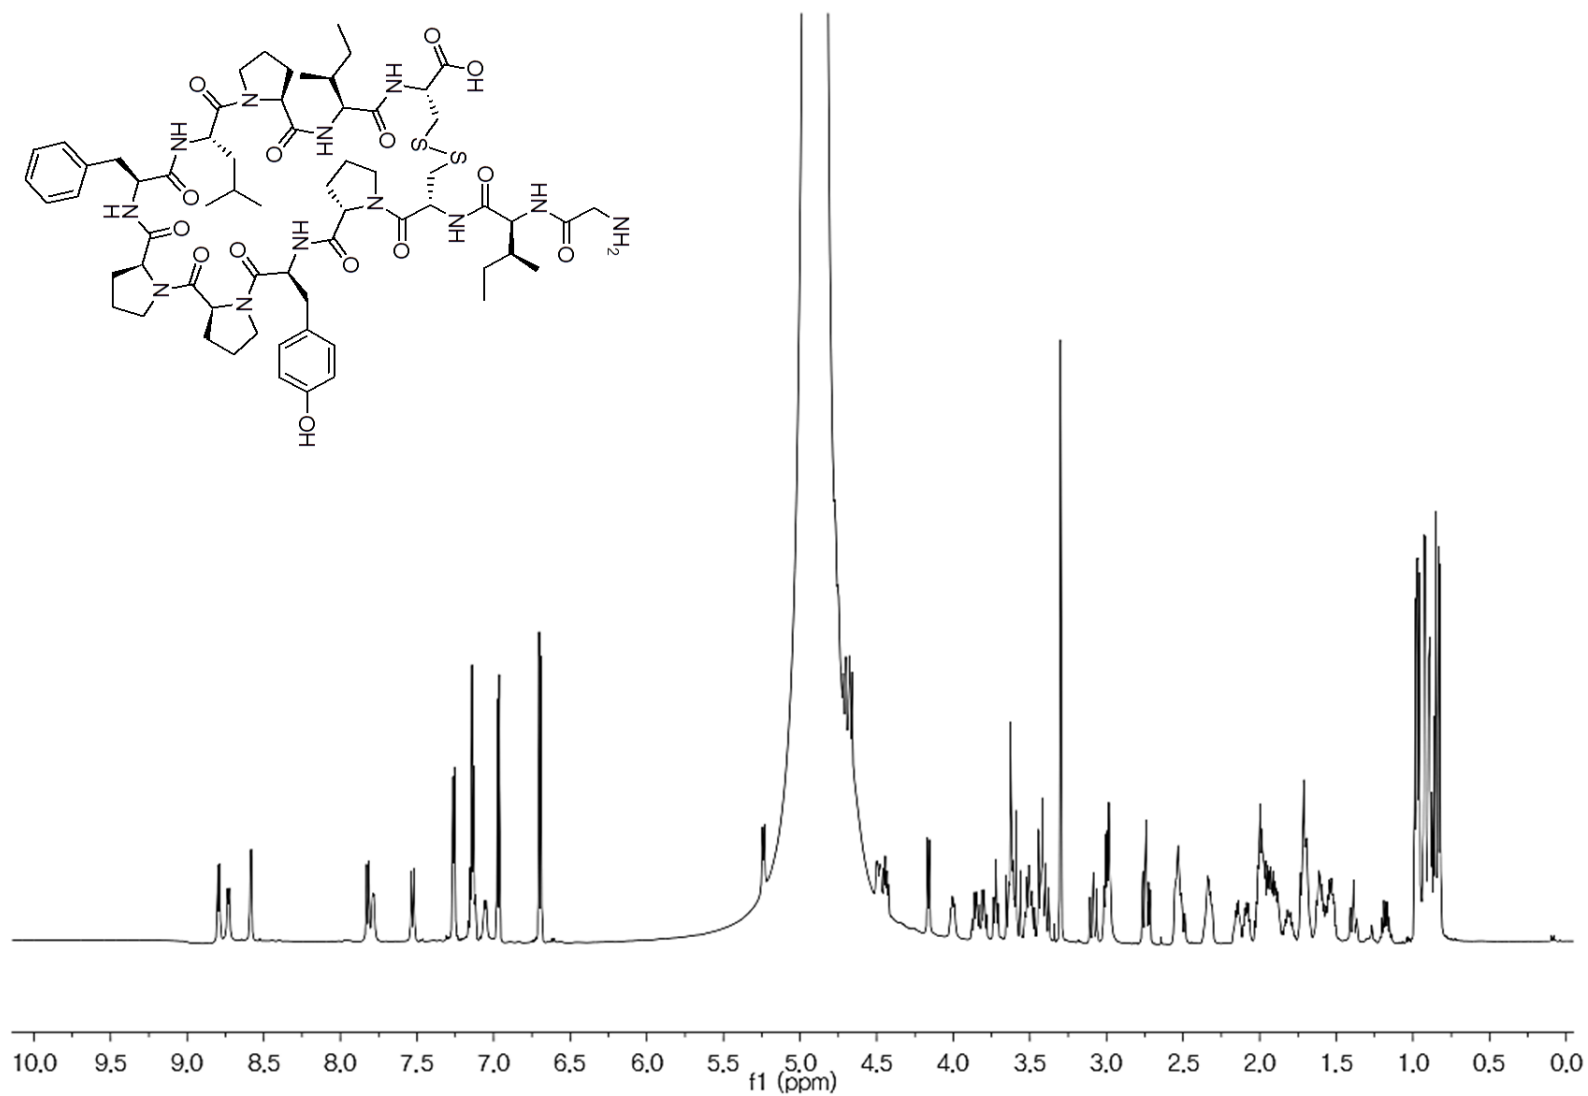

**Figure S9.** The gHMBC (600 MHz, MeOH- $d_3$ ) spectrum of compound **1**.

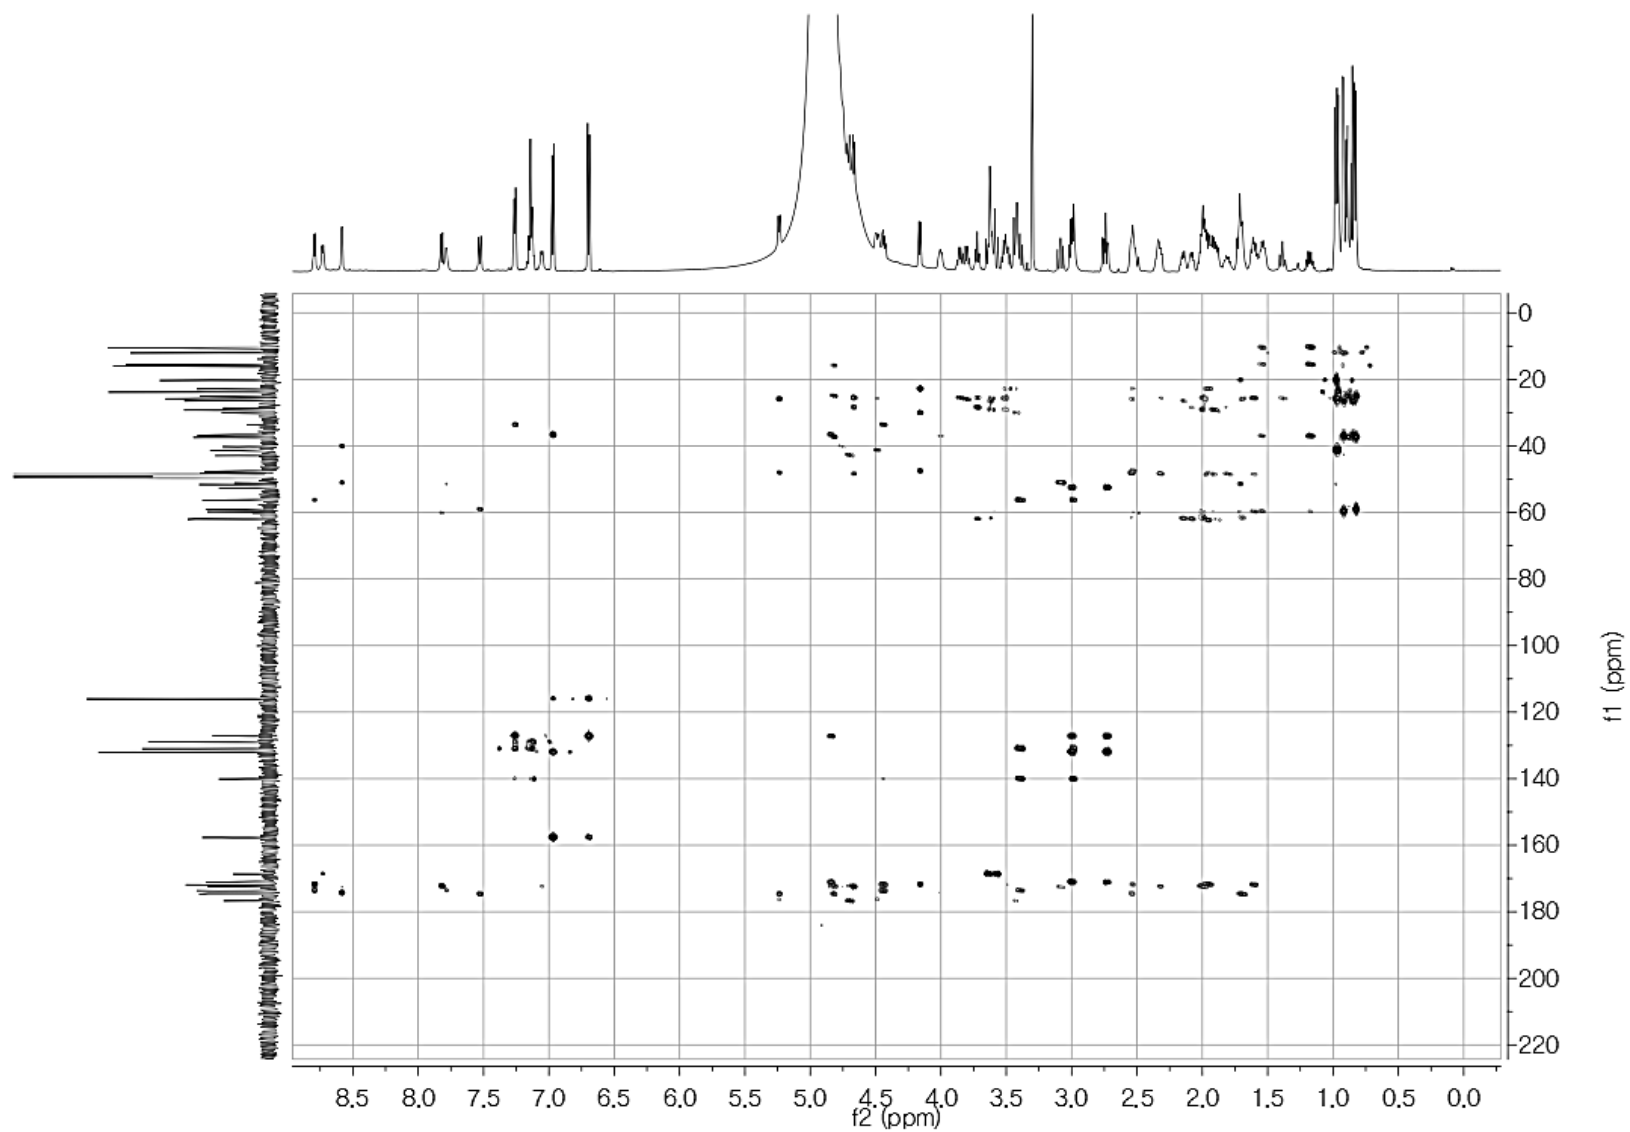

**Figure S10.** The TOCSY (600 MHz, MeOH- $d_3$ ) spectrum of compound **1**.

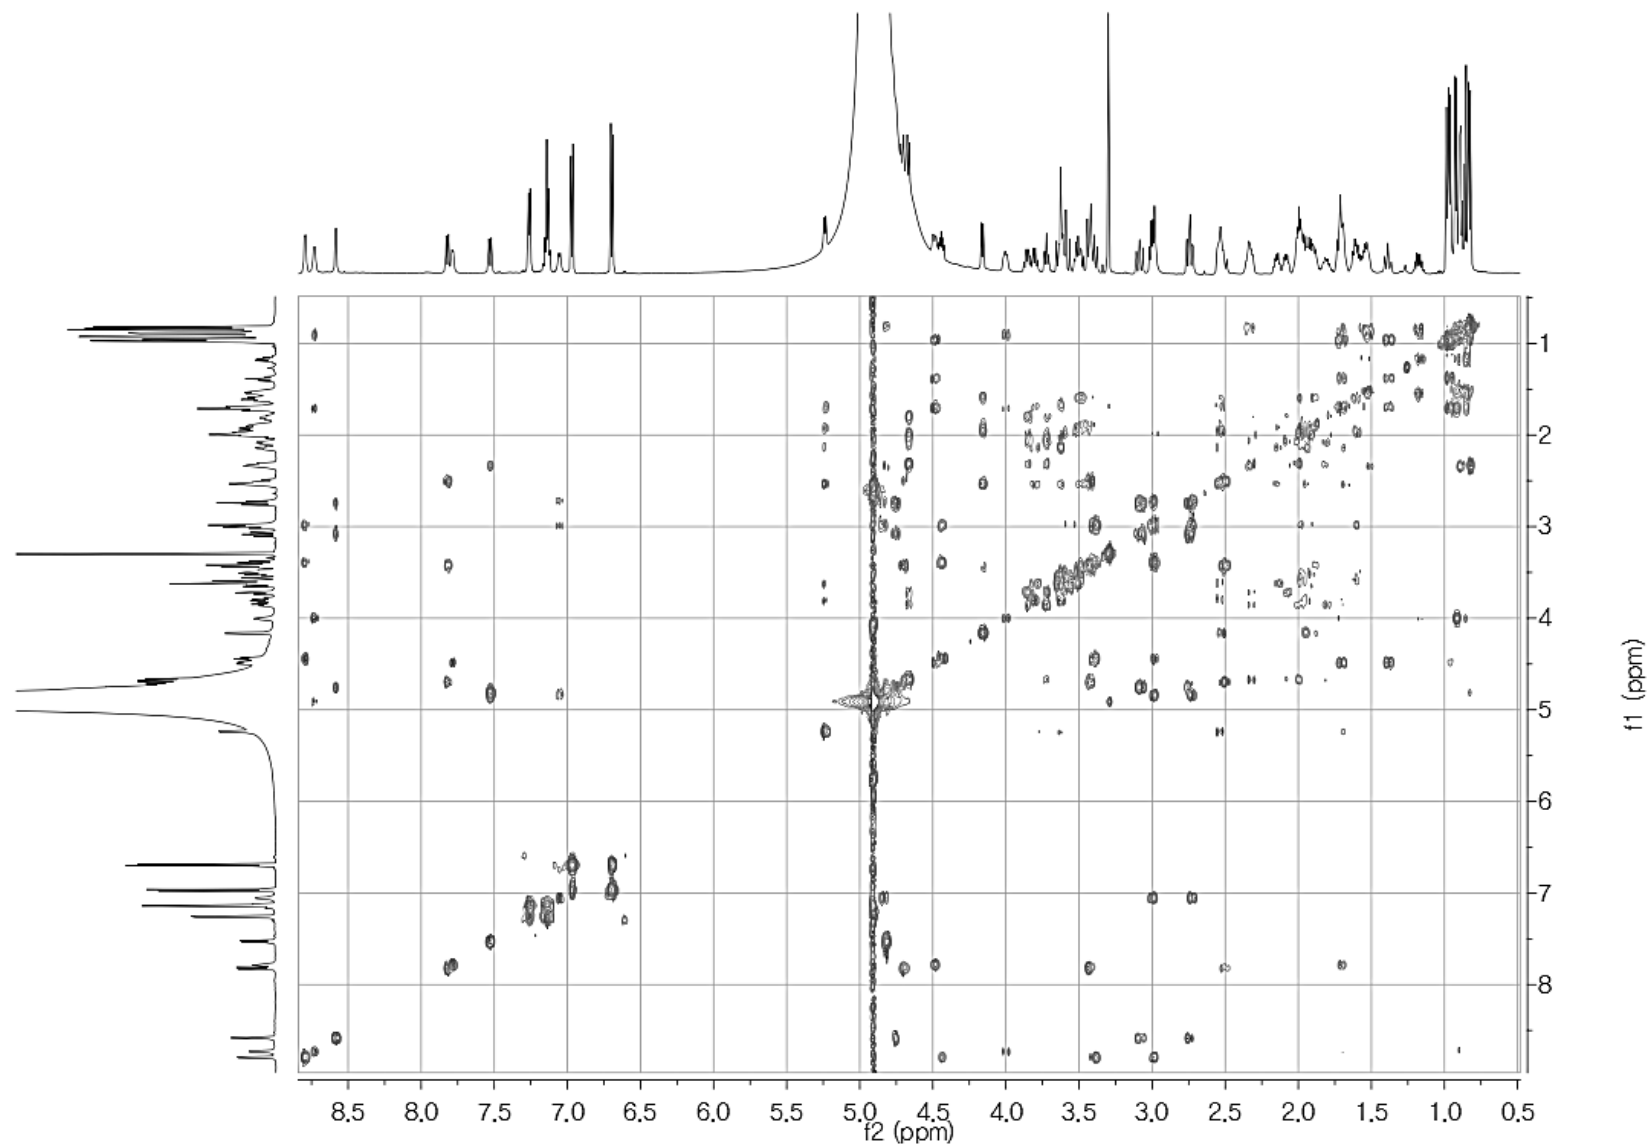

**Figure S11.** The COSY (600 MHz, MeOH- $d_3$ ) spectrum of compound **1**.

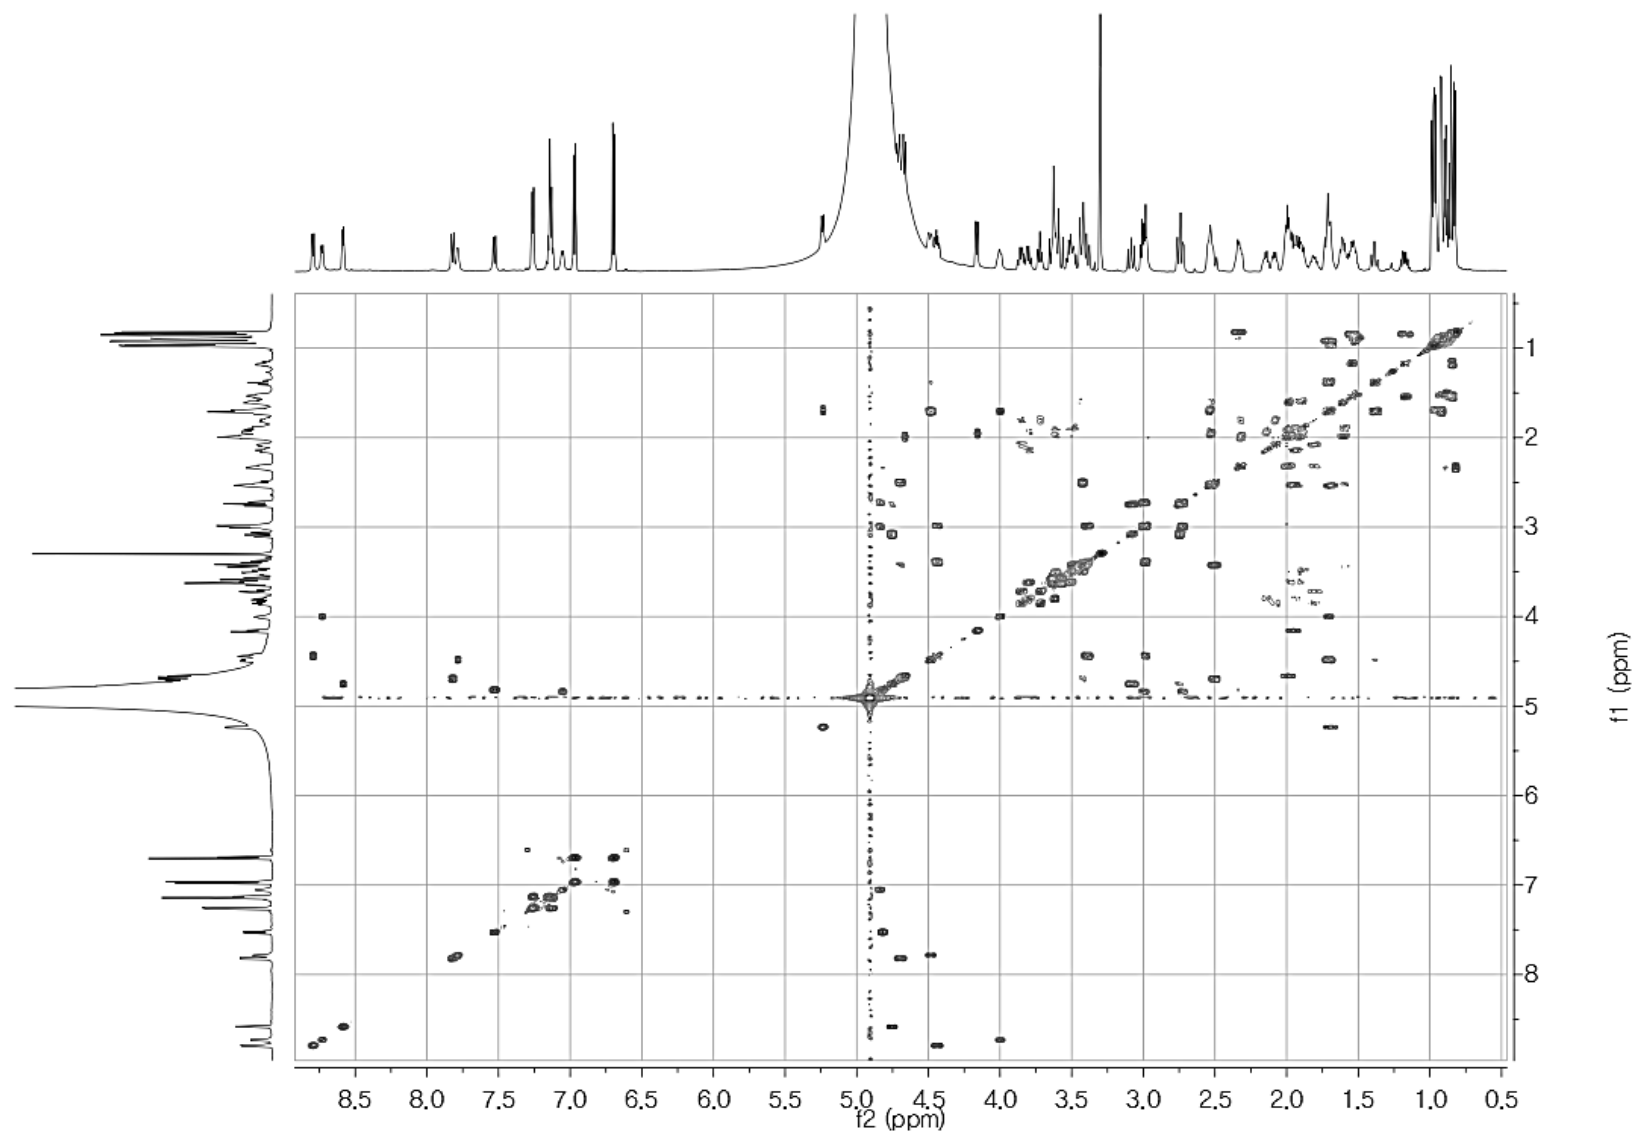

**Figure S12.** The ROESY (600 MHz, MeOH- $d_3$ ) spectrum of compound **1**.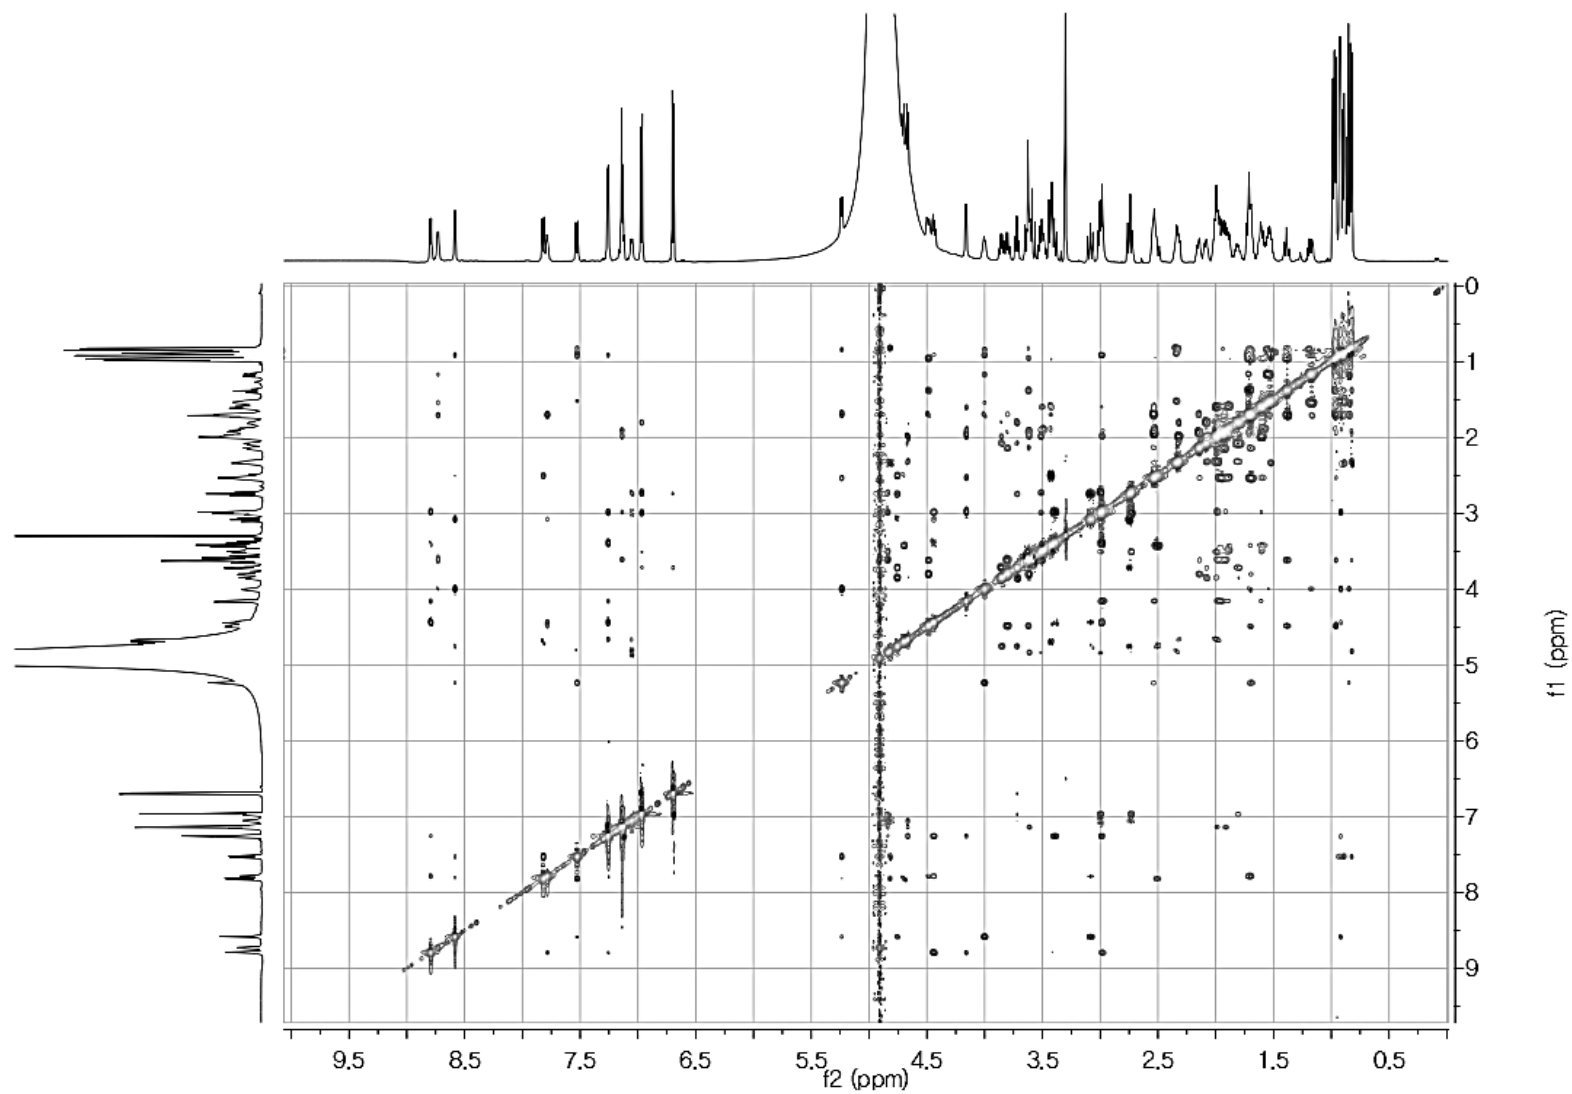

**Figure S13.** The  $^1\text{H}$  NMR (600 MHz,  $\text{MeOH}-d_4$ ) spectrum of compound **2**.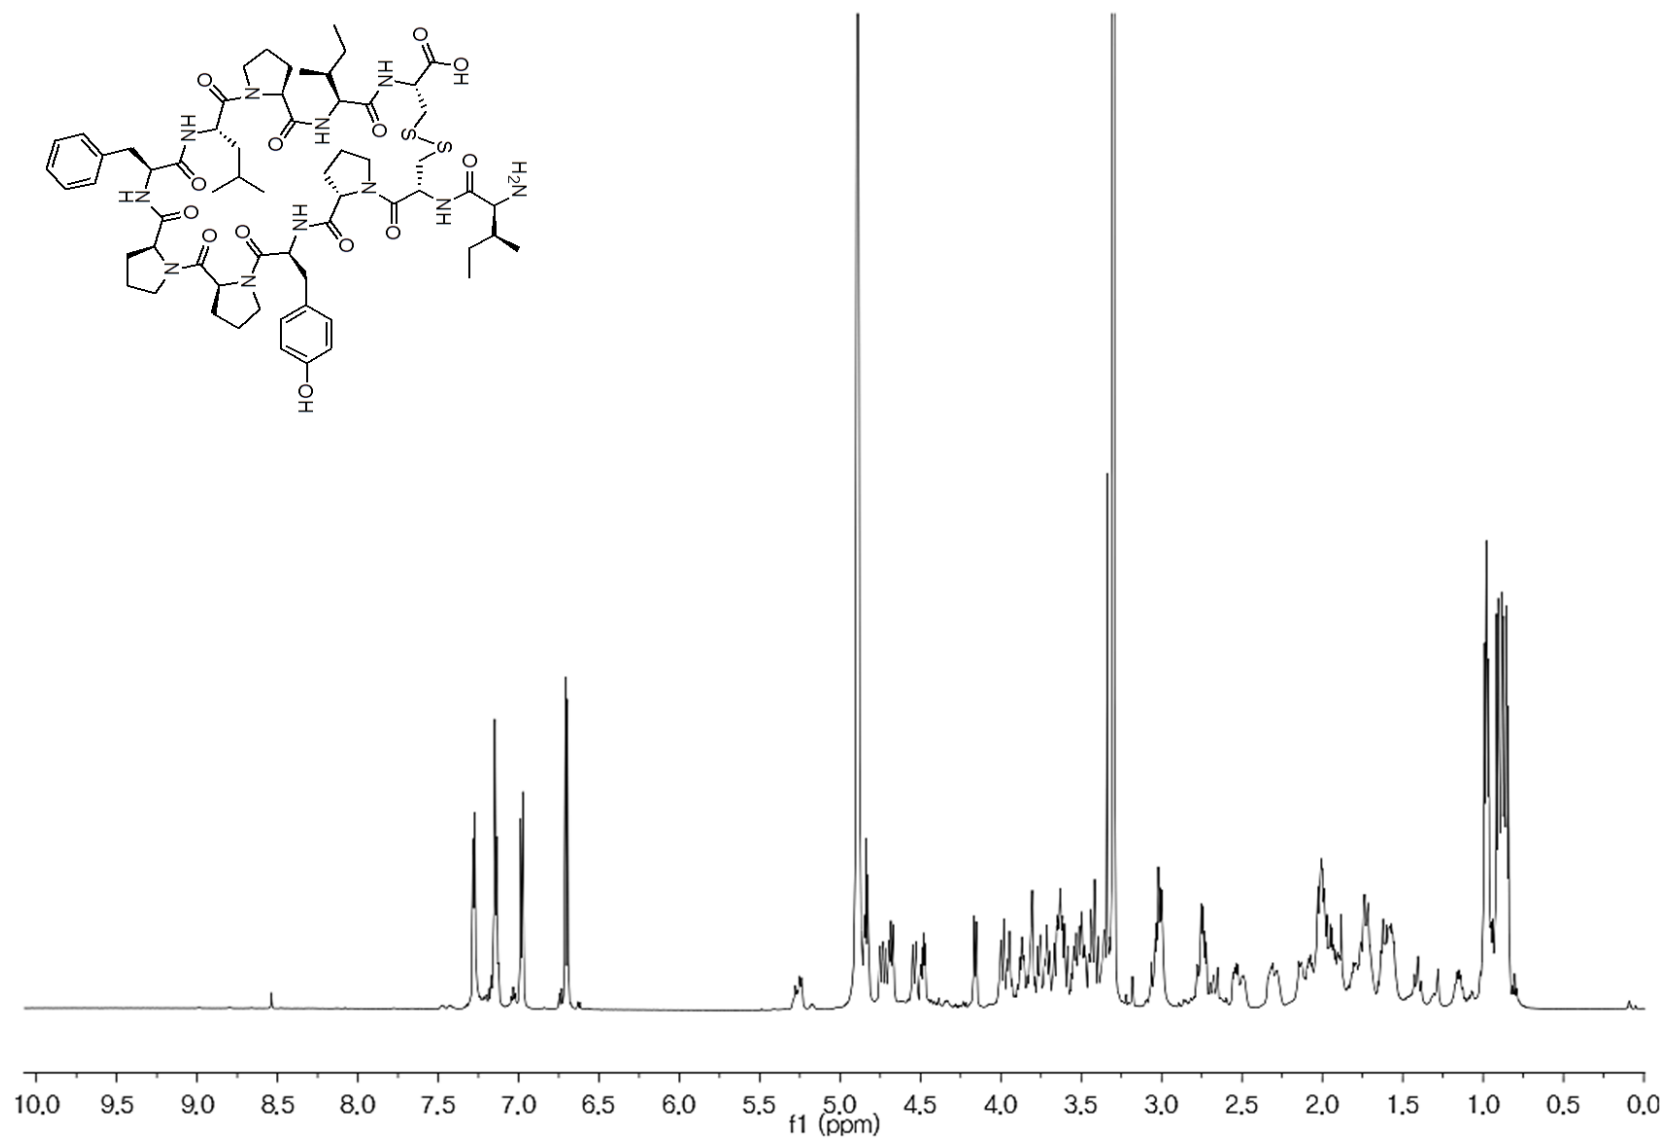

**Figure S14.** The  $^{13}\text{C}$  NMR (150 MHz,  $\text{MeOH-}d_4$ ) spectrum of compound **2**.

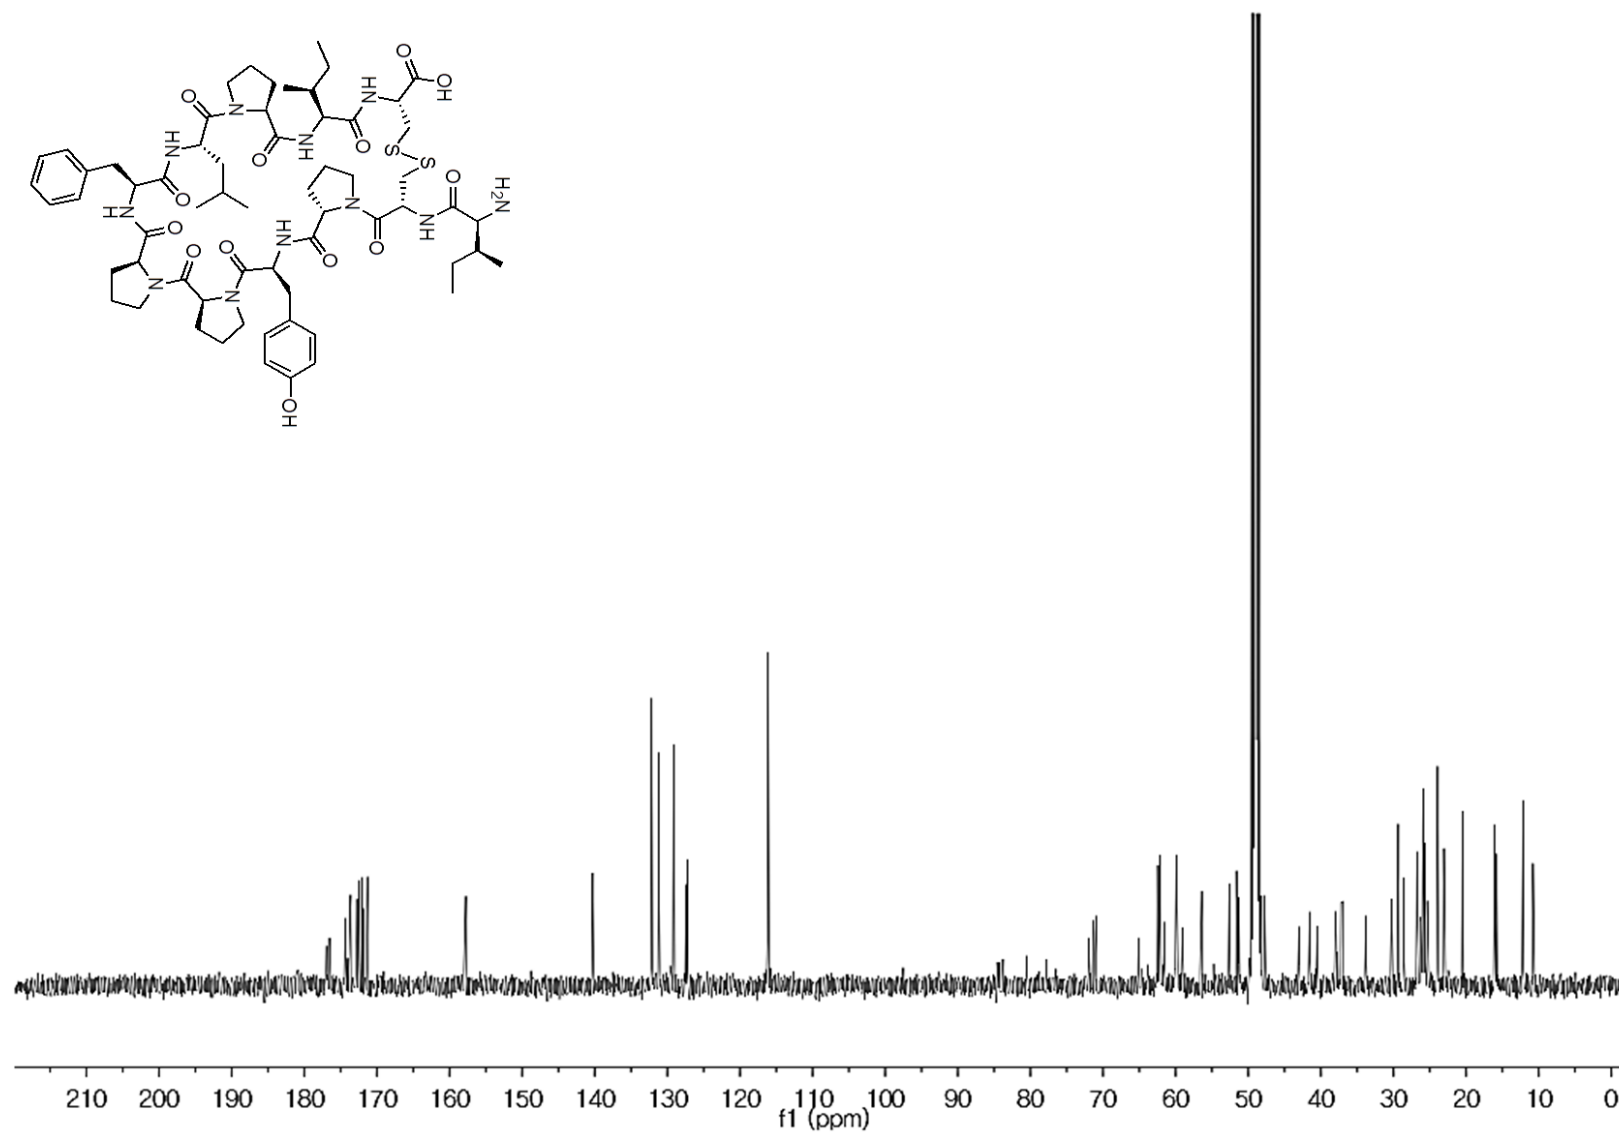

**Figure S15.** The gHSQC (600 MHz, MeOH- $d_4$ ) spectrum of compound 2.

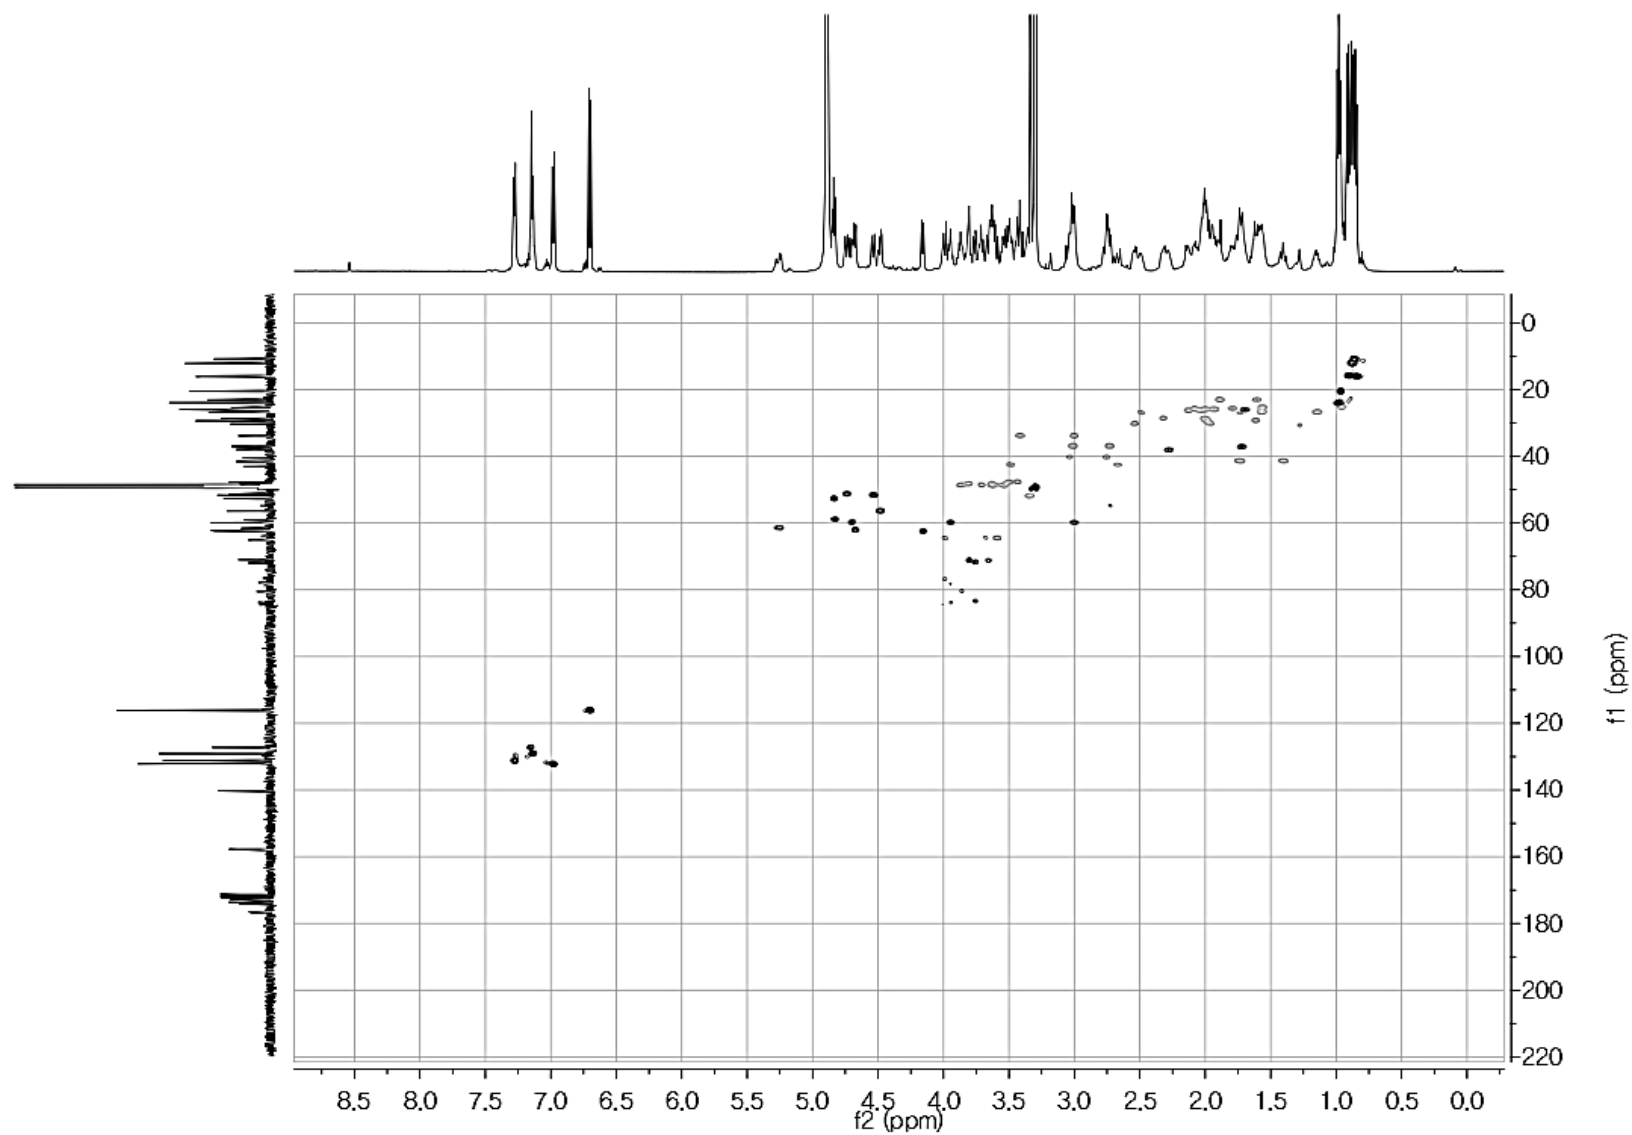

**Figure S16.** The gHMBC (600 MHz, MeOH- $d_4$ ) spectrum of compound **2**.

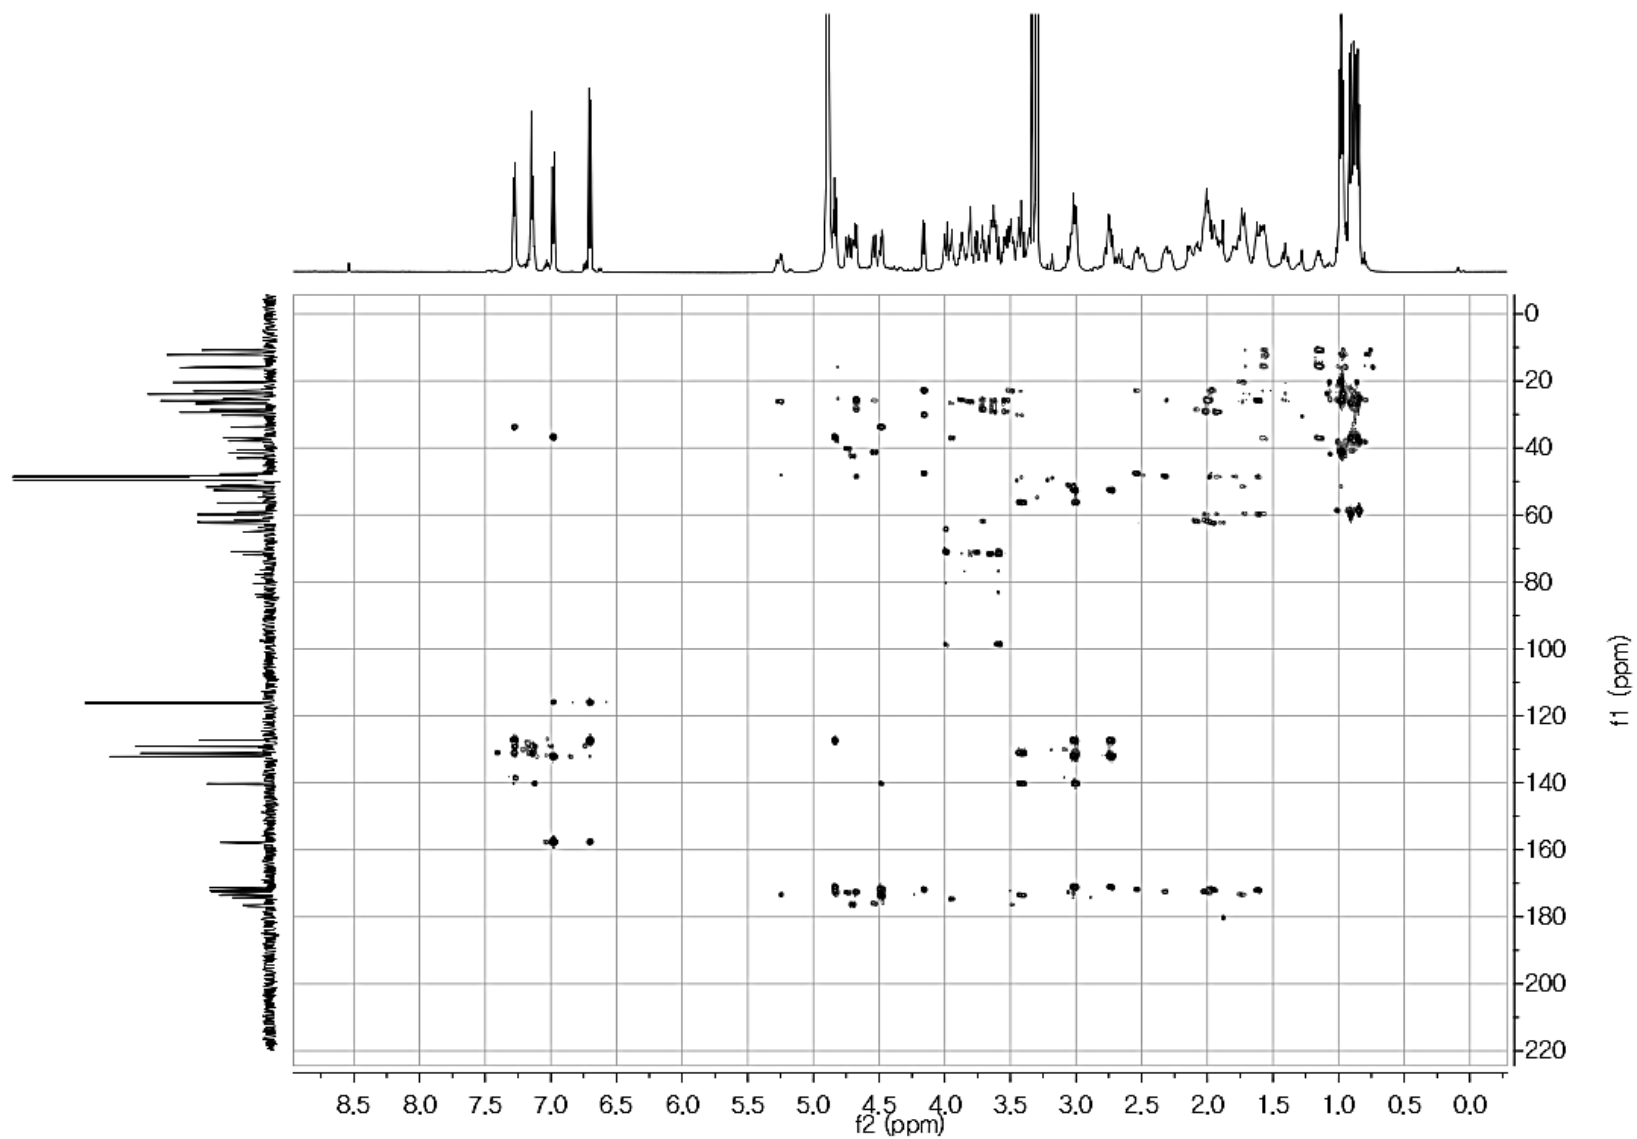

**Figure S17.** The TOCSY (600 MHz, MeOH- $d_4$ ) spectrum of compound 2.

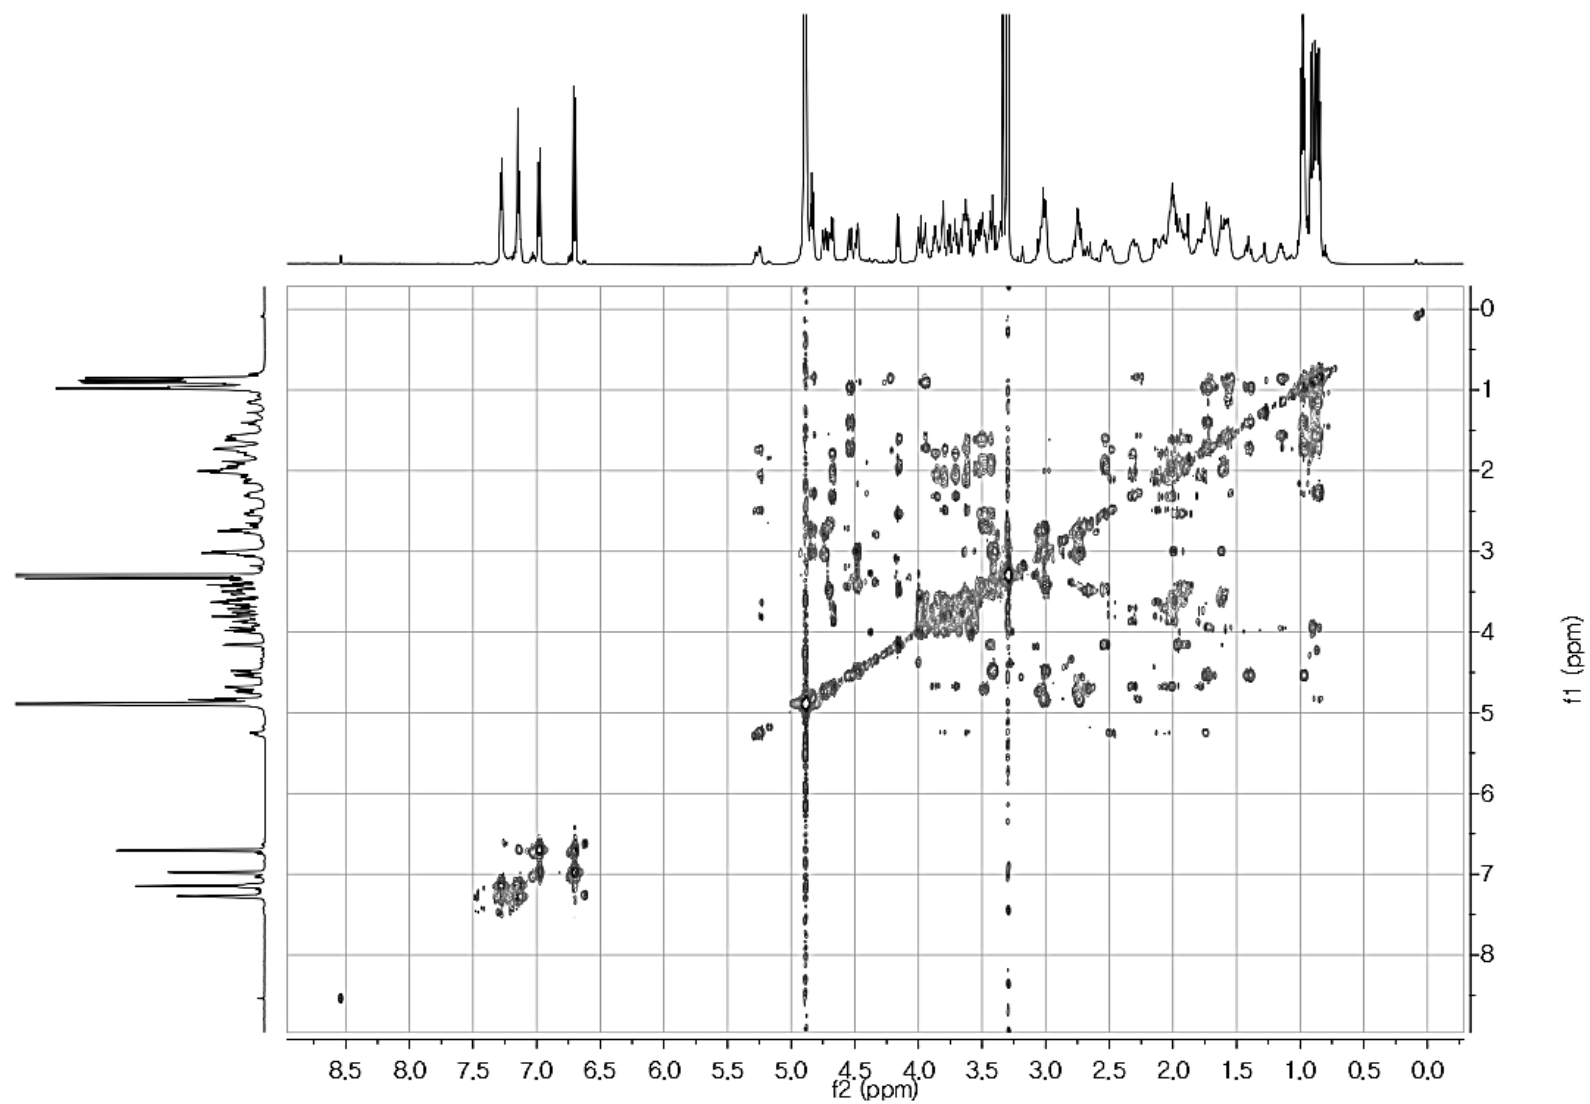

**Figure S18.** The COSY (600 MHz, MeOH- $d_4$ ) spectrum of compound 2.

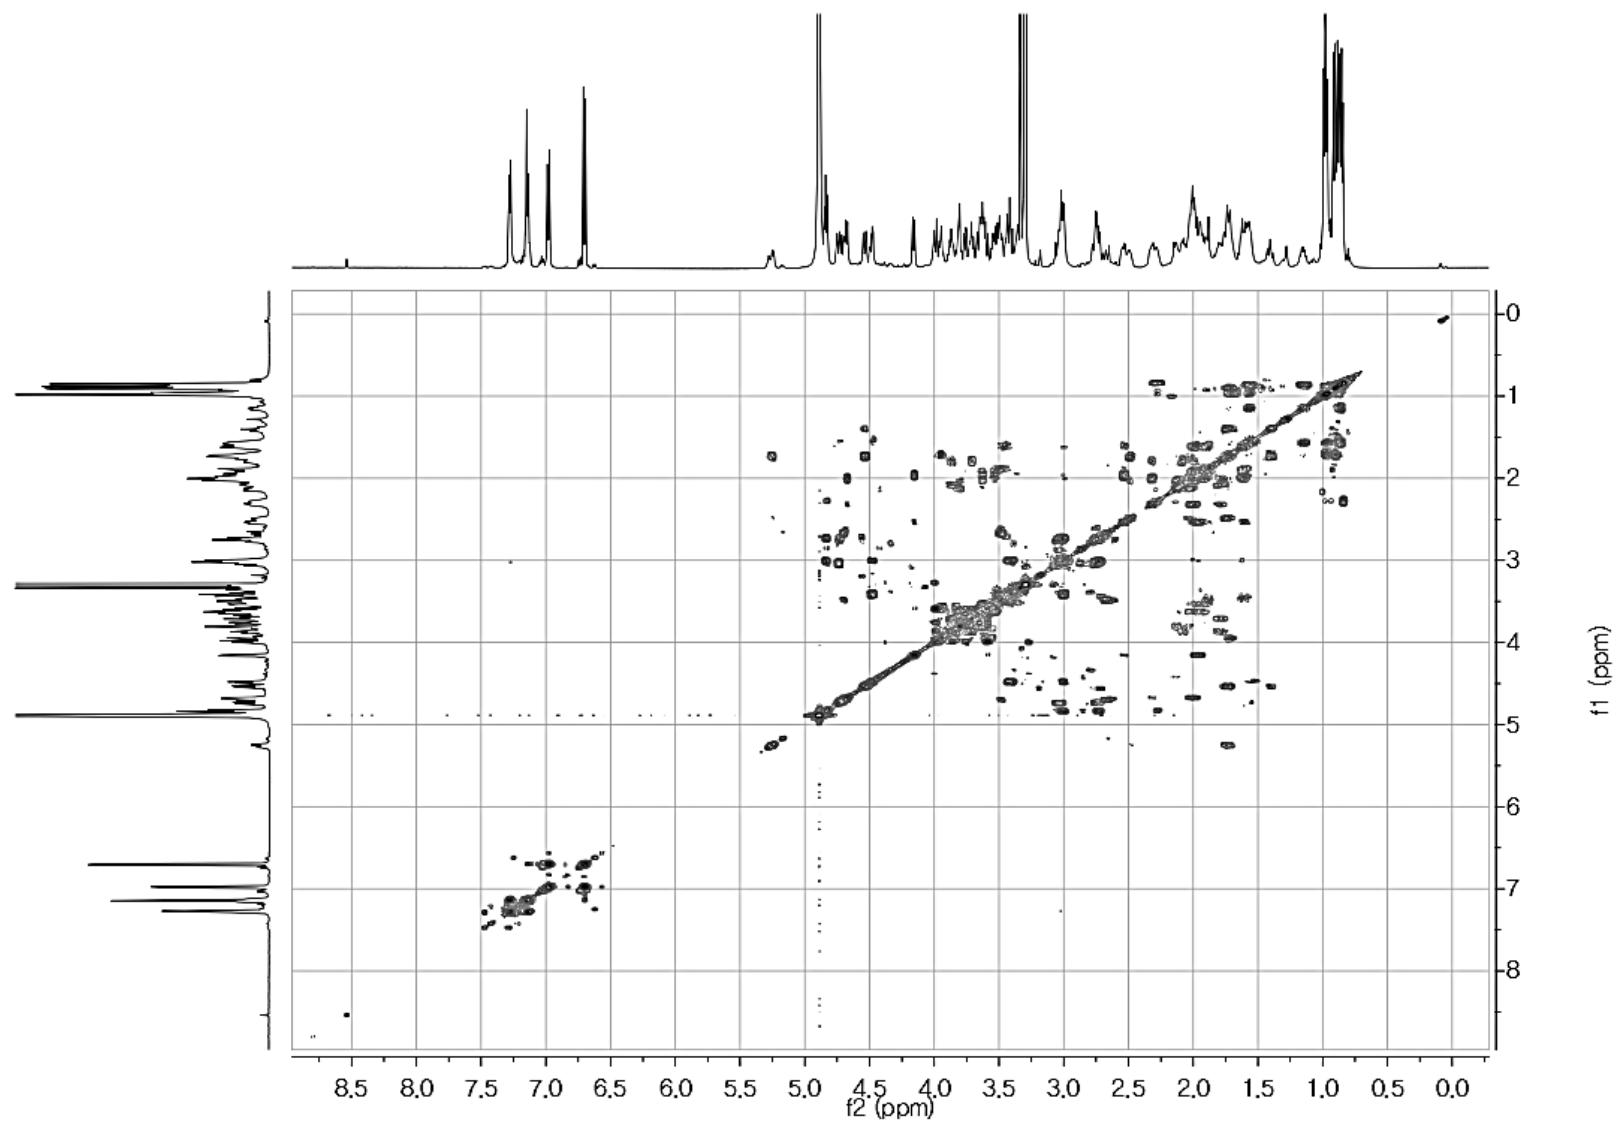

**Figure S19.** The ROESY (600 MHz, MeOH- $d_4$ ) spectrum of compound 2.

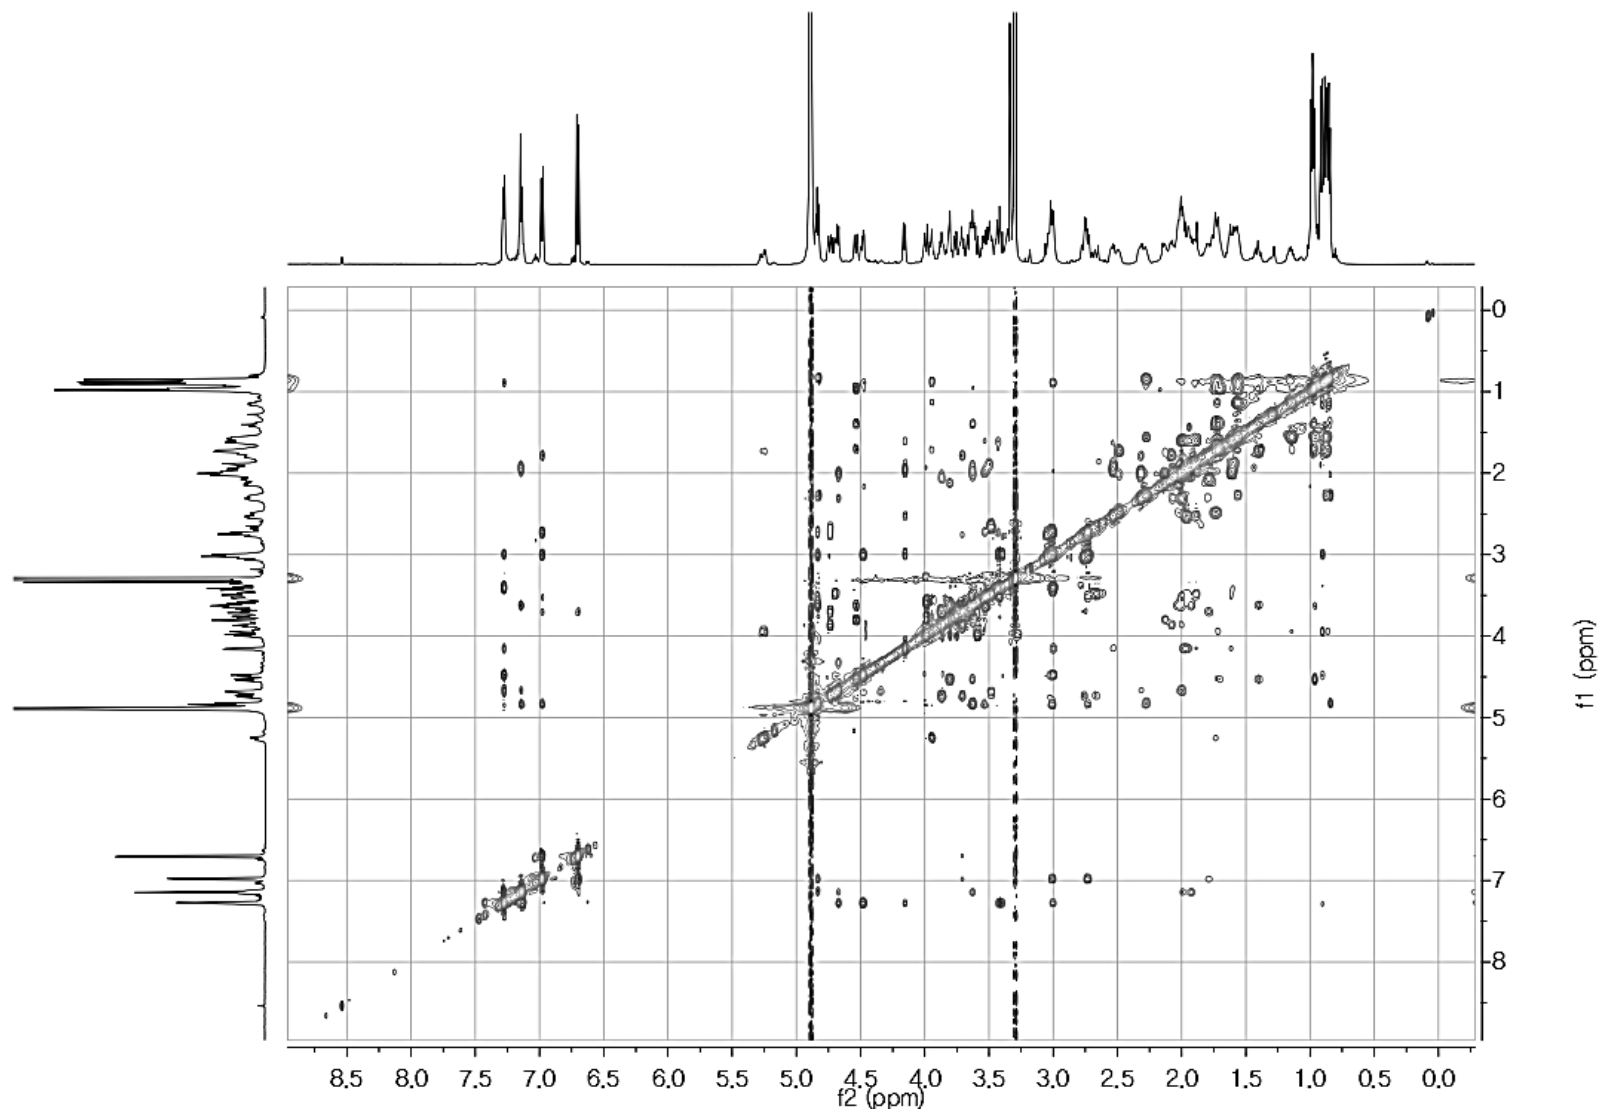

**Figure S20.** The  $^1\text{H}$  NMR (600 MHz,  $\text{MeOH-}d_3$ ) spectrum of compound **2**.

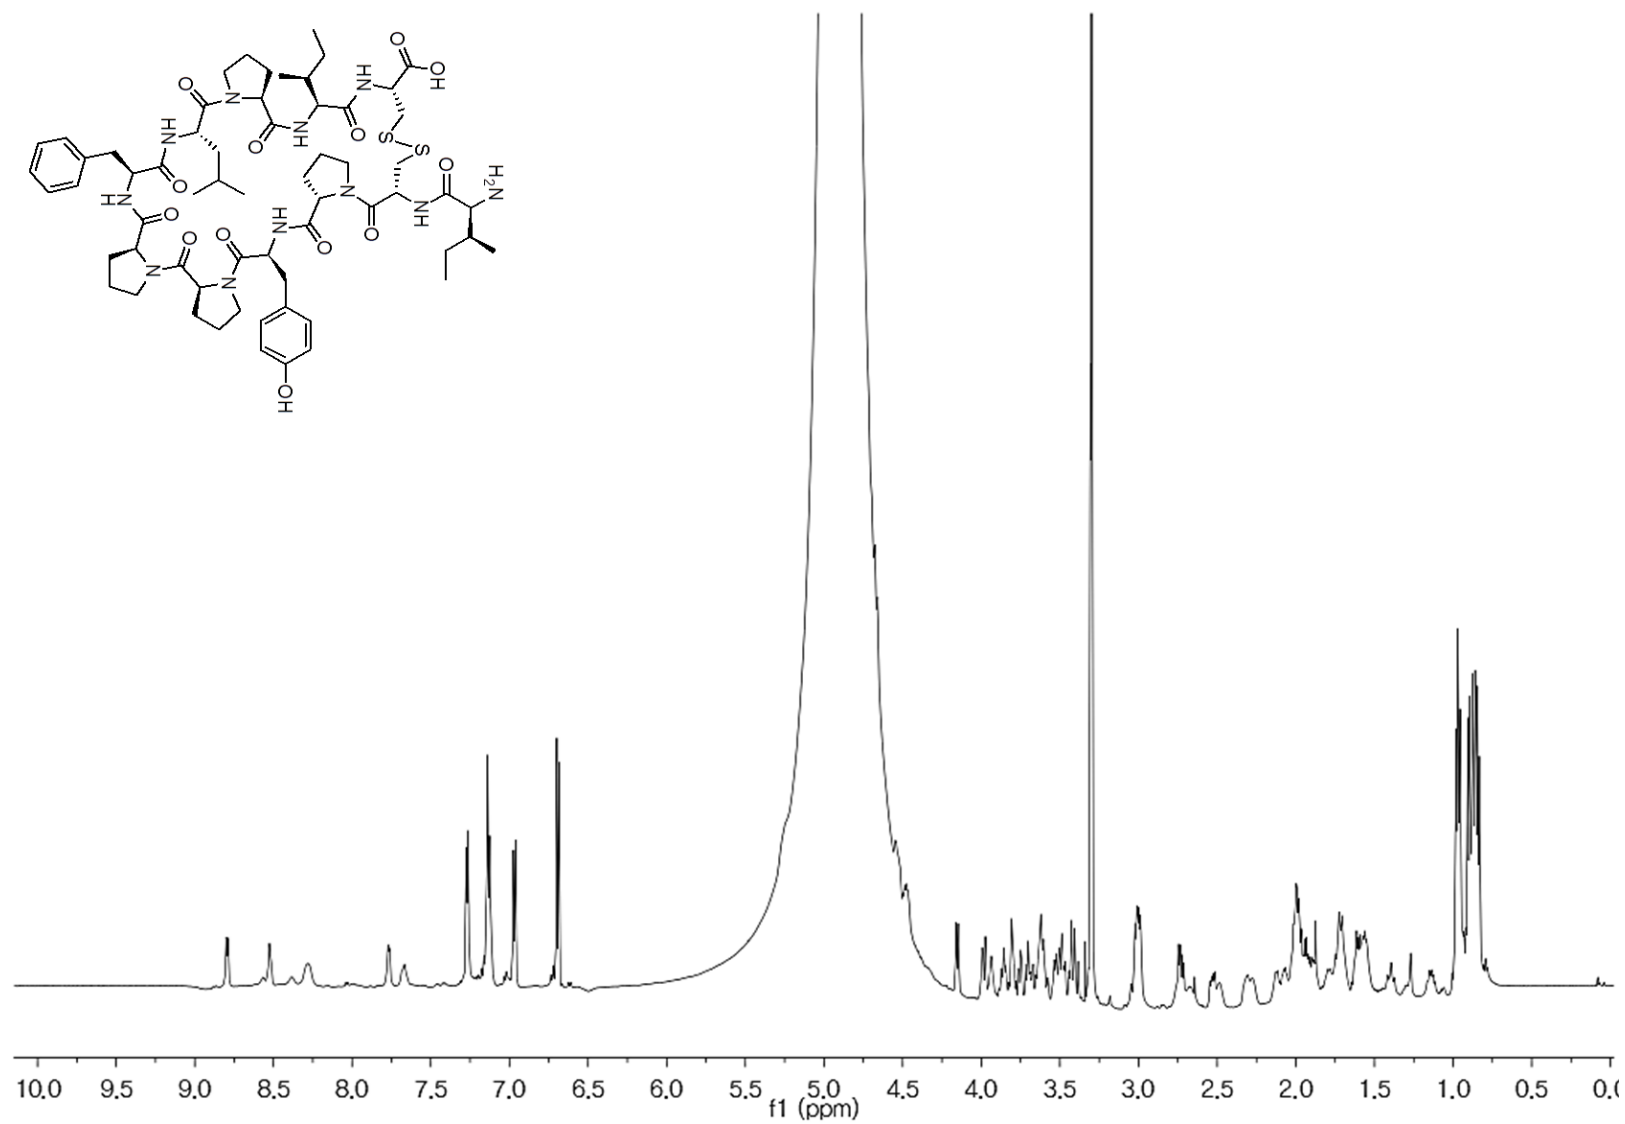

**Figure S21.** The gHMBC (600 MHz, MeOH- $d_4$ ) spectrum of compound **2**.

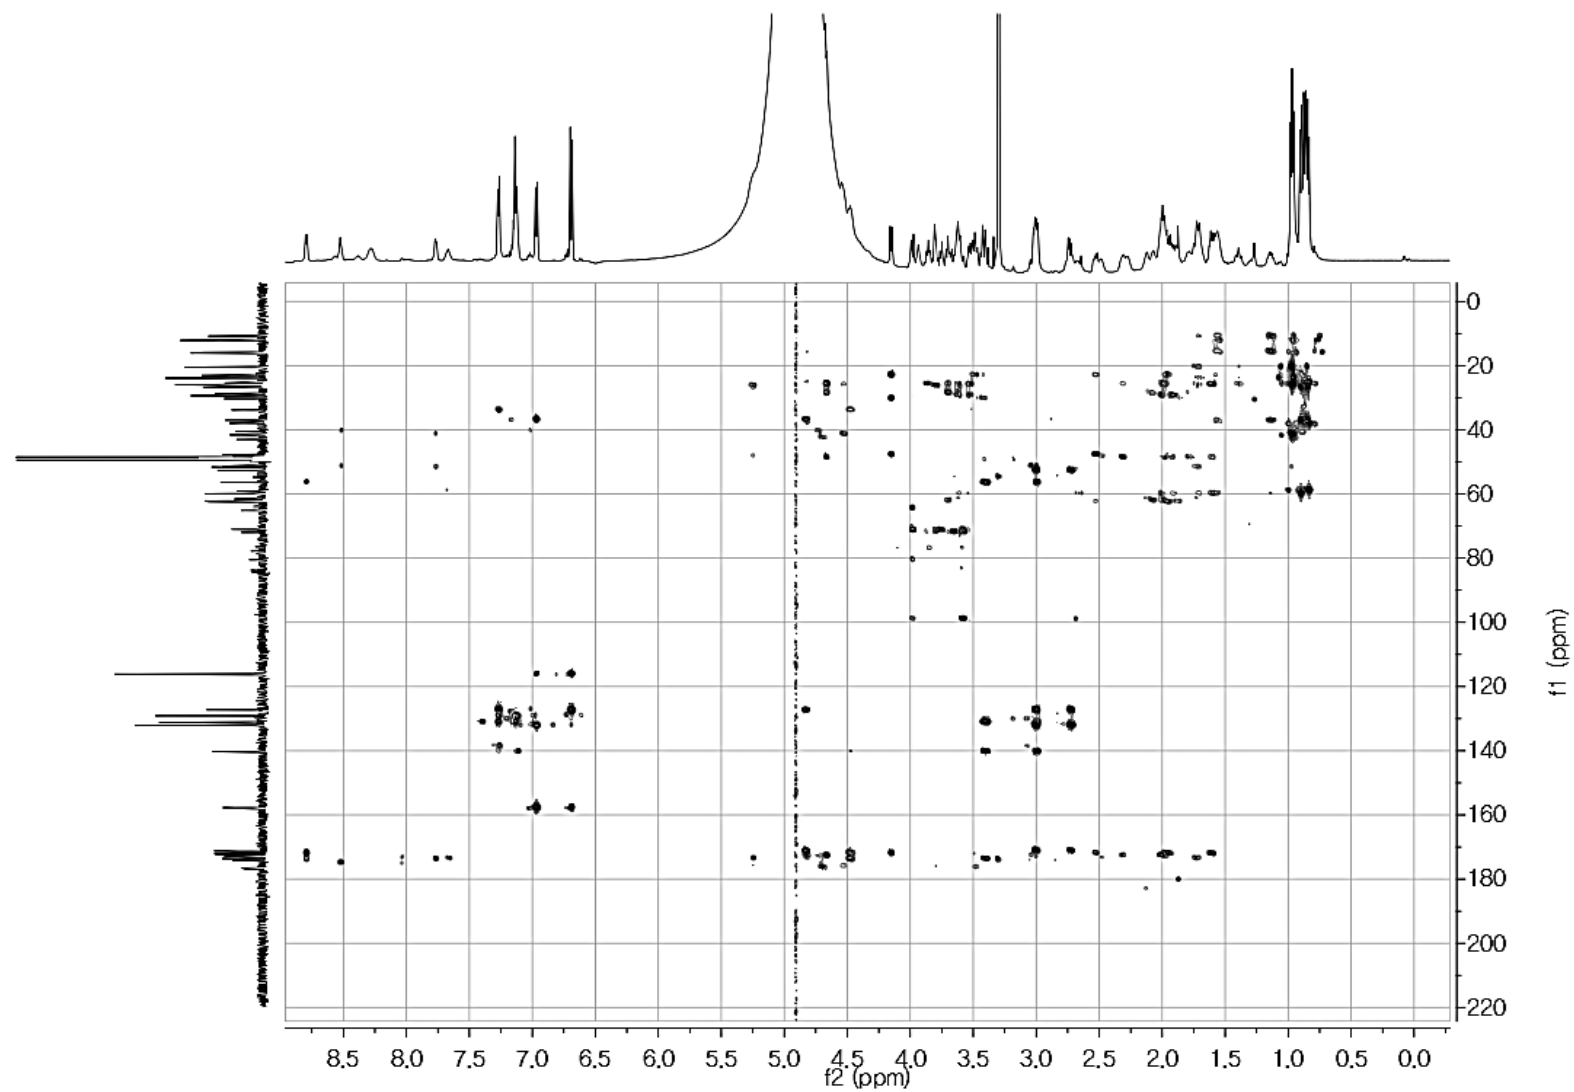

**Figure S22.** The TOCSY (600 MHz, MeOH- $d_3$ ) spectrum of compound 2.

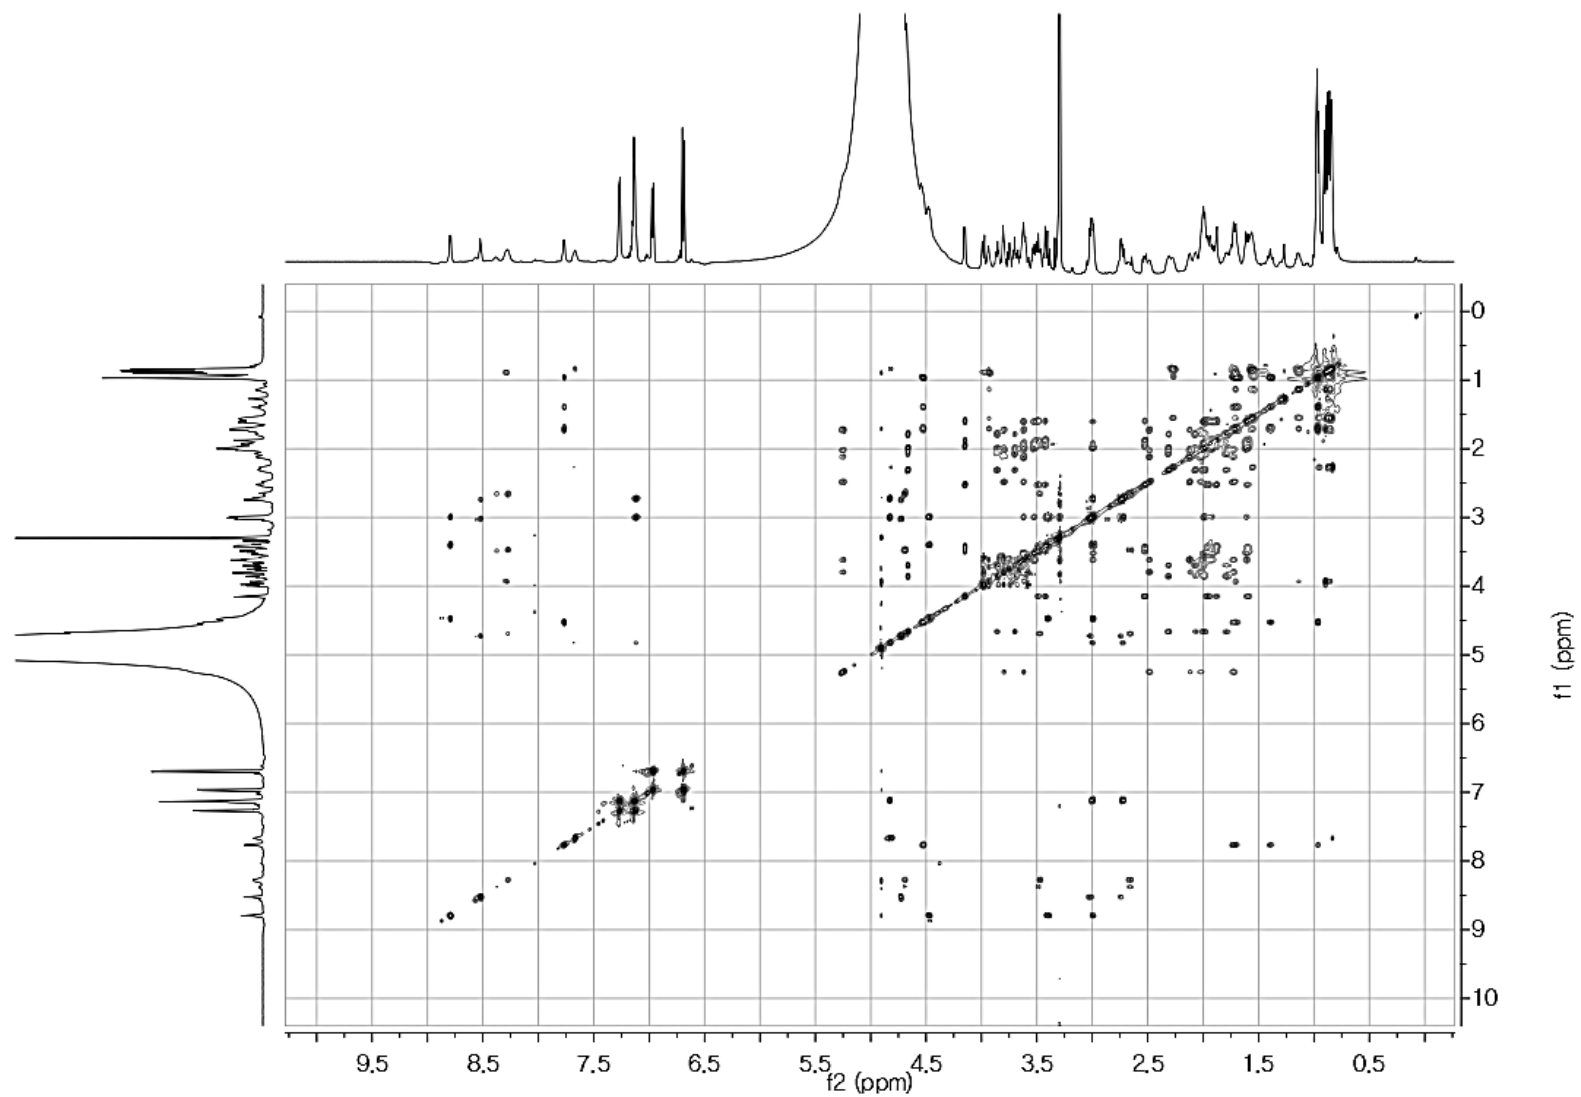

**Figure S23.** The COSY (600 MHz, MeOH- $d_3$ ) spectrum of compound 2.

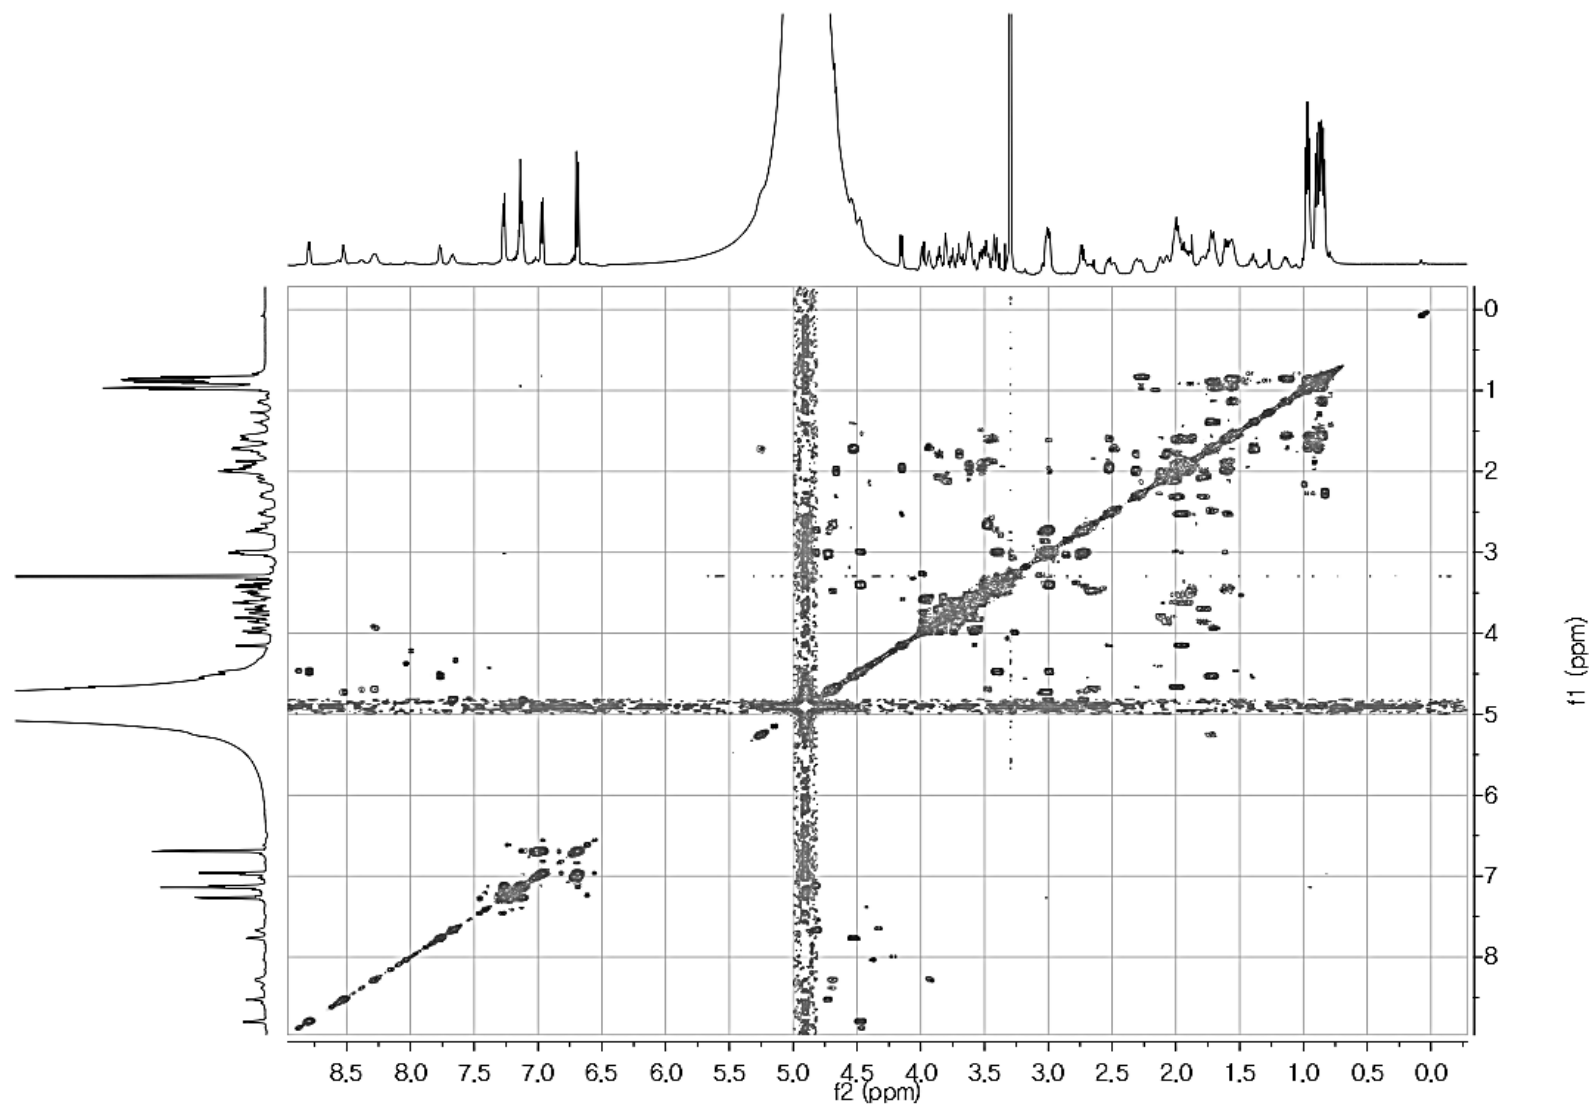

**Figure S24.** The ROESY (600 MHz, MeOH- $d_3$ ) spectrum of compound 2.

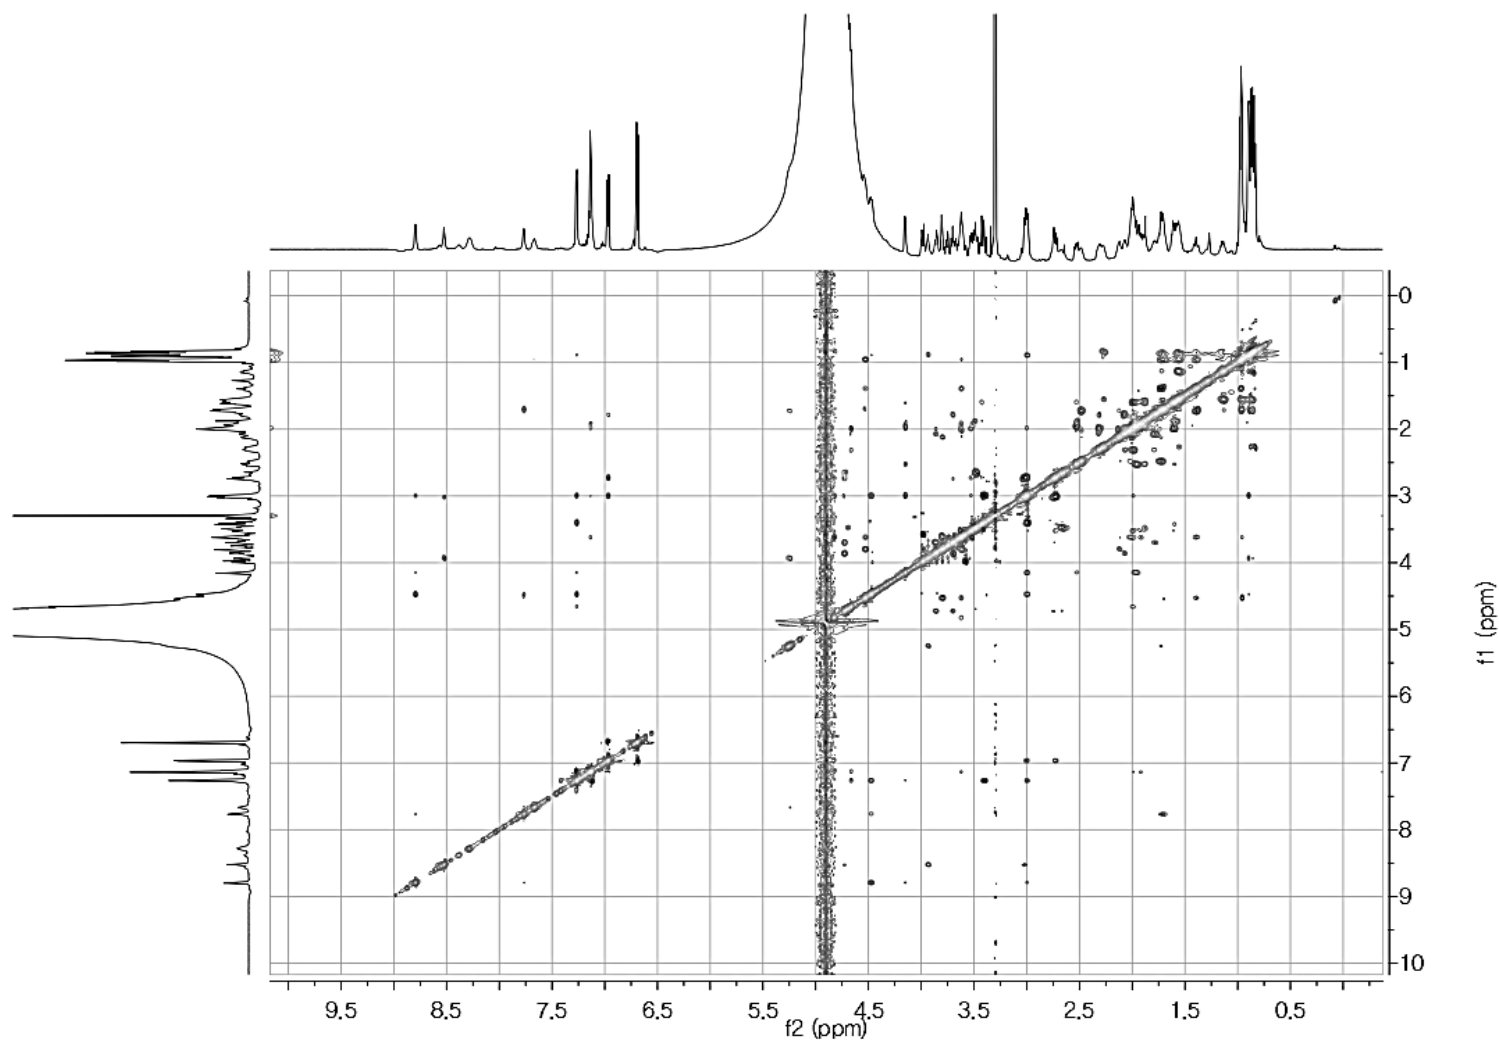

Supplement: Supplementary File 1 — Supplementary Information (PDF, 2809 KB) [file marinedrugs-12-02760-s001.pdf]
